# Supplementary material for: Regioselective synthesis of 1,2- and 1,3-diaminothiacalix[4]arenes via nucleophilic aromatic substitution and their X-ray structures
Source: Royal Society of Chemistry journal article supplement (doi:10.1039/c3ra47718e), 2014-01-01

## Supporting Information

# Regioselective synthesis of 1,2- and 1,3-diaminothiocalix[4]arenes via nucleophilic aromatic substitution and their X-ray structures

Hiroshi Katagiri, Shinya Tanaka,\* Kazuya Ohkubo, Yuki Akahira, Naoya Morohashi, Nobukiho Iki, Tetsutaro Hattori,\* Sotaro Miyano

*Department of Biomolecular Engineering, Graduate School of Engineering, Tohoku University, 6-6-11 Aramaki-Aoba, Aoba-ku, Sendai 980-8579, Japan*

### Contents:

|                                                                                   |     |
|-----------------------------------------------------------------------------------|-----|
| <b>Scheme S1</b> .....                                                            | S2  |
| <b>Fig. S1</b> .....                                                              | S2  |
| <b>Fig. S2</b> .....                                                              | S3  |
| <b>Fig. S3</b> .....                                                              | S3  |
| <b>Fig. S4</b> .....                                                              | S4  |
| <sup>1</sup> H and <sup>13</sup> C NMR spectral charts for compounds synthesized. |     |
| 1. Compound <b>7b</b> .....                                                       | S5  |
| 2. Compound <b>7c</b> .....                                                       | S7  |
| 3. Compound <b>8</b> .....                                                        | S9  |
| 4. Compound <b>9b</b> .....                                                       | S11 |
| 5. Compound <b>9c</b> .....                                                       | S13 |
| 6. Compound <b>10b</b> .....                                                      | S15 |
| 7. Compound <b>10c</b> .....                                                      | S17 |
| 8. Compound <b>5b</b> .....                                                       | S19 |
| 9. Compound <b>5c</b> .....                                                       | S21 |

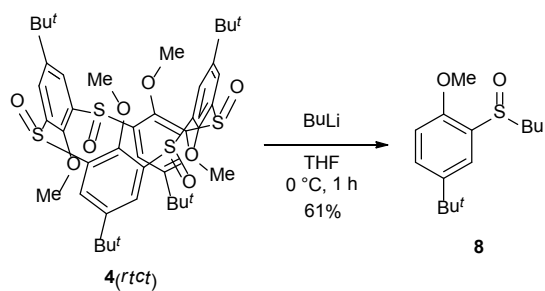

**Scheme S1.** Reaction of compound **4**(*rtct*) with butyllithium.

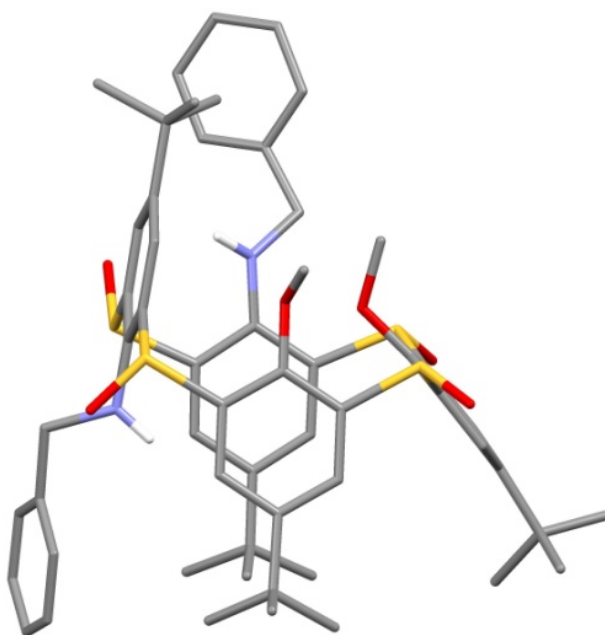

**Fig. S1.** X-ray structure of di(benzylamine) **7c**. Hydrogen atoms except for NH and solvent molecules are omitted for clarity.

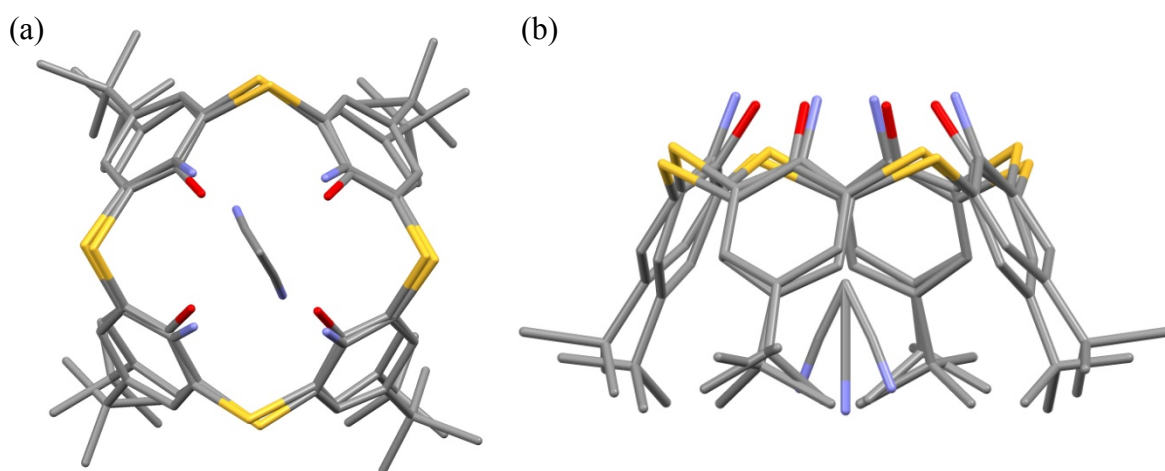

**Fig. S2.** X-ray structure of **5b**·CH<sub>3</sub>CN: (a) Top view and (b) side view of disordered structure. Protons of the NH<sub>2</sub> and OH groups were not found. Hydrogen atoms are omitted for clarity.

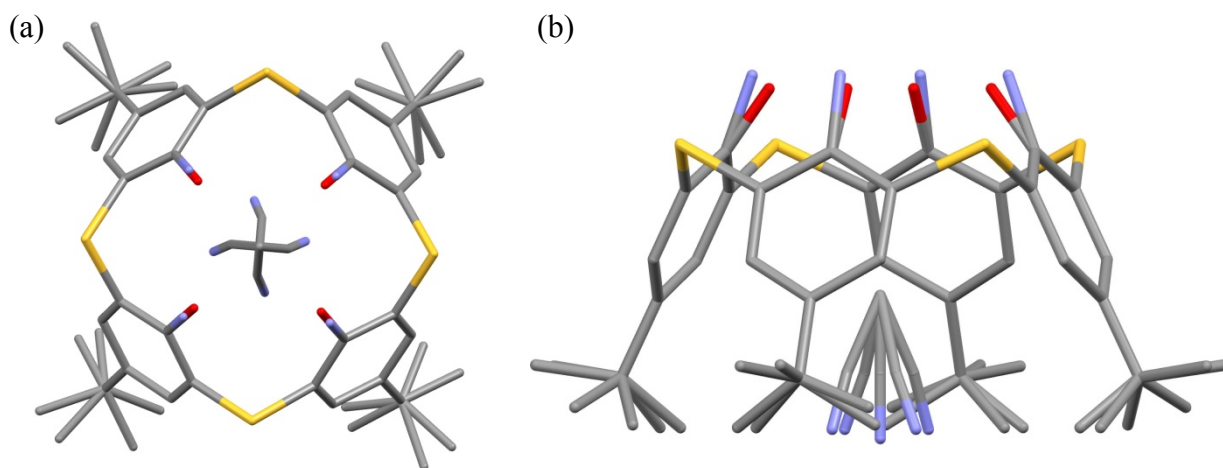

**Fig. S3.** X-ray structure of **5c**·CH<sub>3</sub>CN: (a) Top view and (b) side view of disordered structure. Protons of the NH<sub>2</sub> and OH groups were not found. Hydrogen atoms are omitted for clarity.

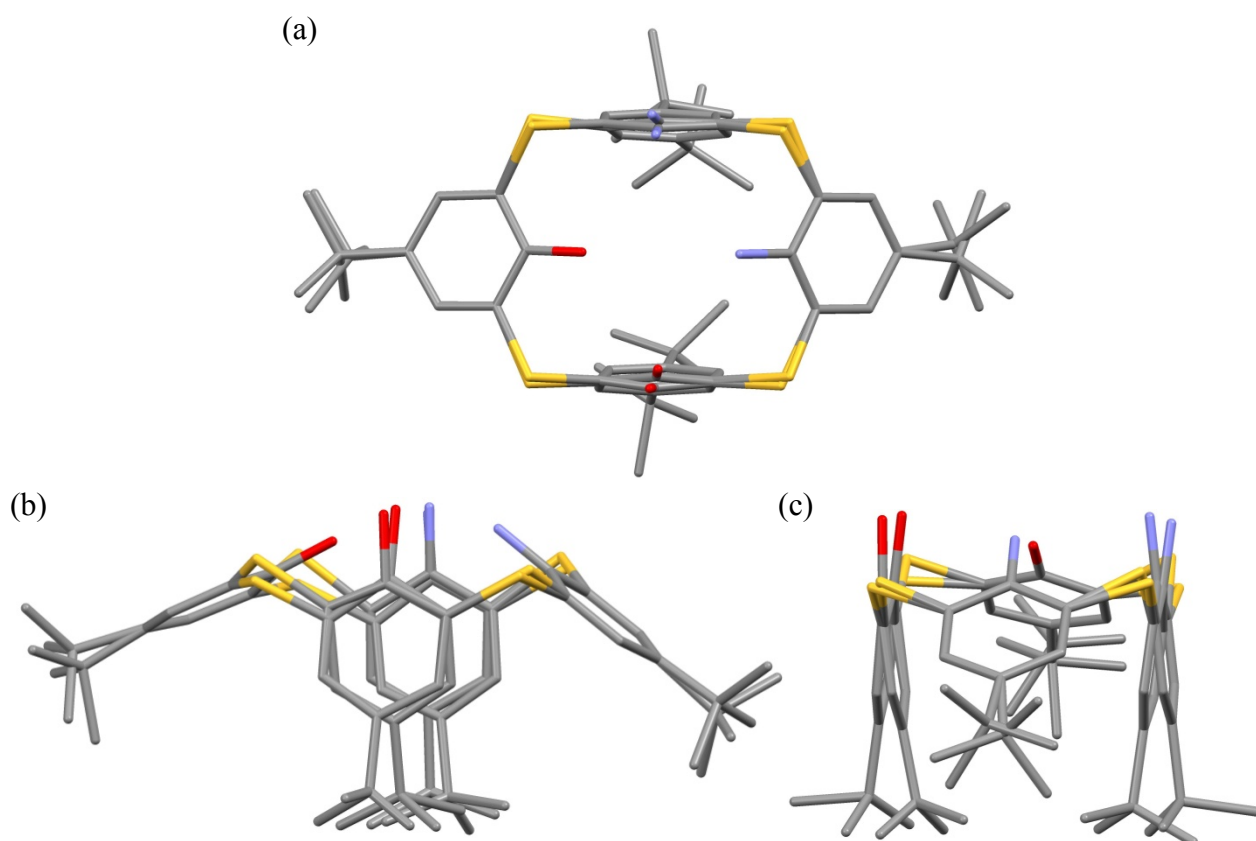

**Fig. S4.** X-ray structure of **5c**·CH<sub>3</sub>CN: (a) Top view and (b, c) side views of disordered structure. Protons of the NH<sub>2</sub> and OH groups were not found. Hydrogen atoms are omitted for clarity.

**25,27-Di(benzylamino)-26,28-dimethoxy-tetra-*p*-*tert*-butylsulfinylcalix[4]arene (7b)**

$\delta_{\text{H}}$  (400 MHz) 1.00 [9 H, s, C(CH<sub>3</sub>)<sub>3</sub>], 1.06 [18 H, s, C(CH<sub>3</sub>)<sub>3</sub> × 2], 1.44 [9 H, s, C(CH<sub>3</sub>)<sub>3</sub>], 3.30 (3 H, s, OCH<sub>3</sub>), 3.85 (3 H, s, OCH<sub>3</sub>), 4.60 (2 H, dd, *J* 12.7 and 5.66, NHCH<sub>2</sub> × 2), 4.66 (2 H, dd, *J* 12.7 and 5.66, NHCH<sub>2</sub> × 2), 6.17 (2 H, t, *J* 5.66, NHCH<sub>2</sub> × 2), 7.33–7.45 (14 H, m, ArH), 7.83 (2 H, s, ArH) and 8.15 (2 H, s, ArH)

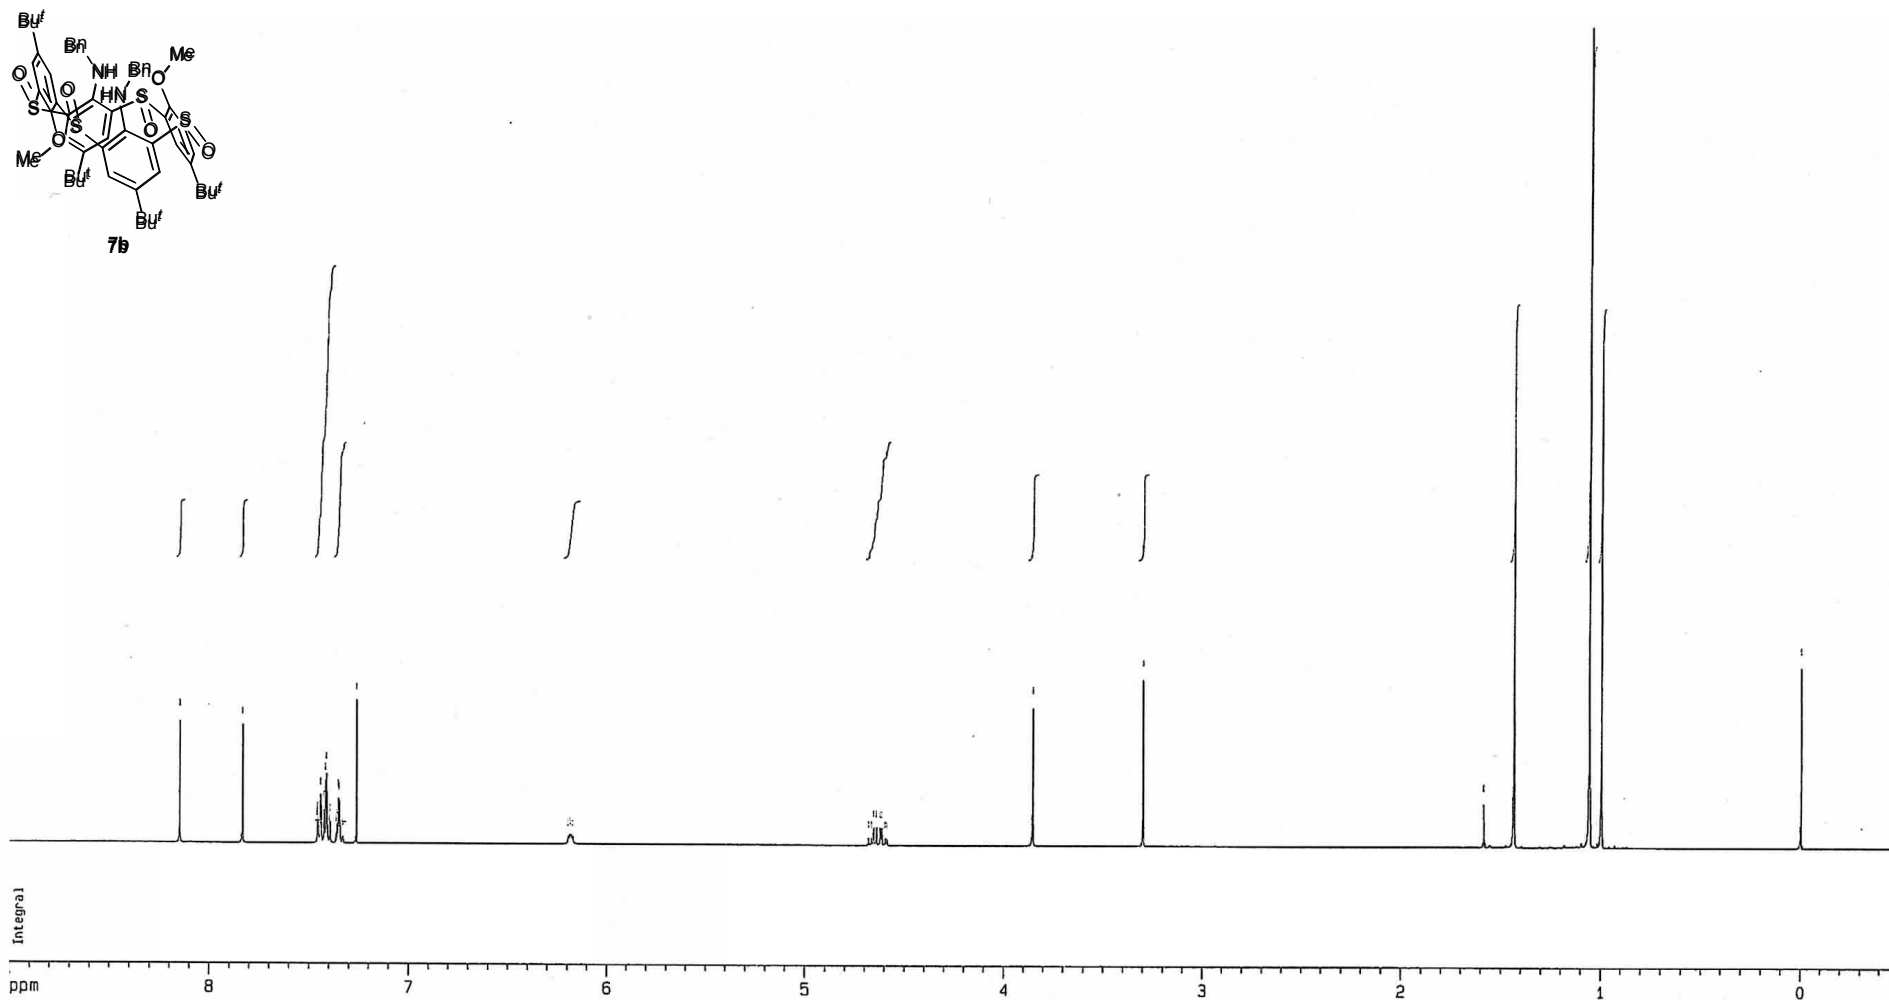

**25,27-Di(benzylamino)-26,28-dimethoxy-tetra-*p-tert*-butylsulfinylcalix[4]arene (7b)**

$\delta_C$  (100 MHz) 30.72, 30.84, 31.42, 34.06, 34.97, 35.62, 54.34, 61.03, 61.12, 123.12, 125.00, 125.37, 128.03, 128.27, 128.99, 129.25, 130.70, 131.38, 134.73, 137.67, 138.51, 140.97, 145.62, 147.40, 147.90, 149.03 and 149.88

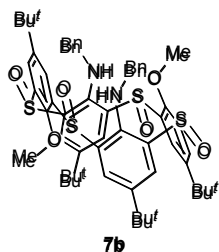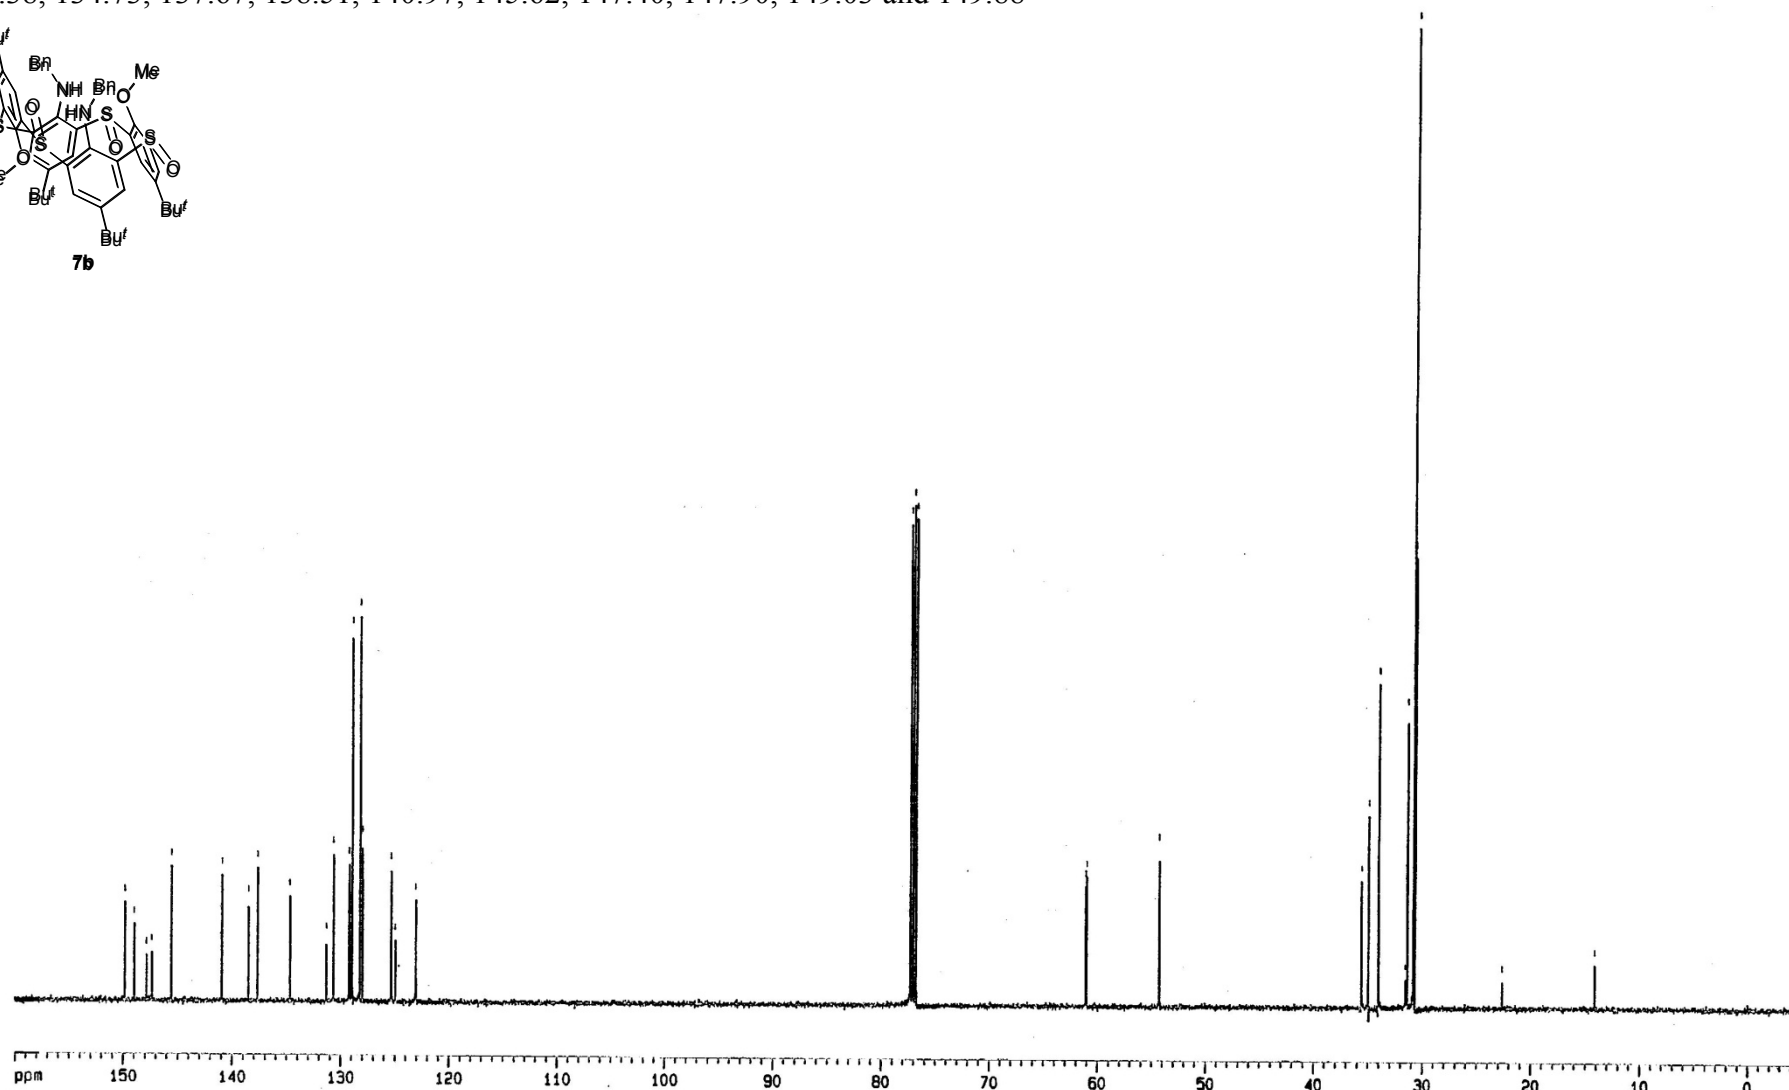

**25,26-Di(benzylamino)-27,28-dimethoxy-tetra-*p*-*tert*-butylsulfinylcalix[4]arene (7c)**

$\delta_{\text{H}}$  (400 MHz) 0.59 [9 H, s, C(CH<sub>3</sub>)<sub>3</sub>], 1.05 [9 H, s, C(CH<sub>3</sub>)<sub>3</sub>], 1.25 [9 H, s, C(CH<sub>3</sub>)<sub>3</sub>], 1.41 [9 H, s, C(CH<sub>3</sub>)<sub>3</sub>], 3.49 (3 H, s, OCH<sub>3</sub>), 3.54-3.57 (1 H, m, ArNHCH<sub>2</sub>), 4.08 (3 H, s, OCH<sub>3</sub>), 4.29 (1 H, t, *J* 10.1 Hz, NHCH<sub>2</sub>), 4.34-4.40 (1 H, m, NHCH<sub>2</sub>), 4.68-4.70 (2 H, m, NHCH<sub>2</sub>), 6.65 (1 H, br, NHCH<sub>2</sub>), 6.93 (1 H, d, *J* 2.3, ArH), 7.29-7.43 (8 H, m, ArH), 7.48-7.50 (2 H, m, ArH), 7.58-7.60 (2 H, m, ArH), 7.81 (1 H, d, *J* 2.3 Hz, ArH), 7.86 (1 H, d, *J* 2.4, ArH), 8.03 (1 H, d, *J* 2.3, ArH), 8.05 (1 H, d, *J* 2.4, ArH) and 8.12 (1 H, d, *J* 2.4, ArH)

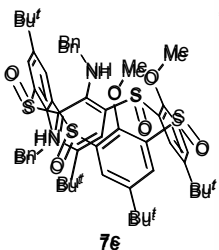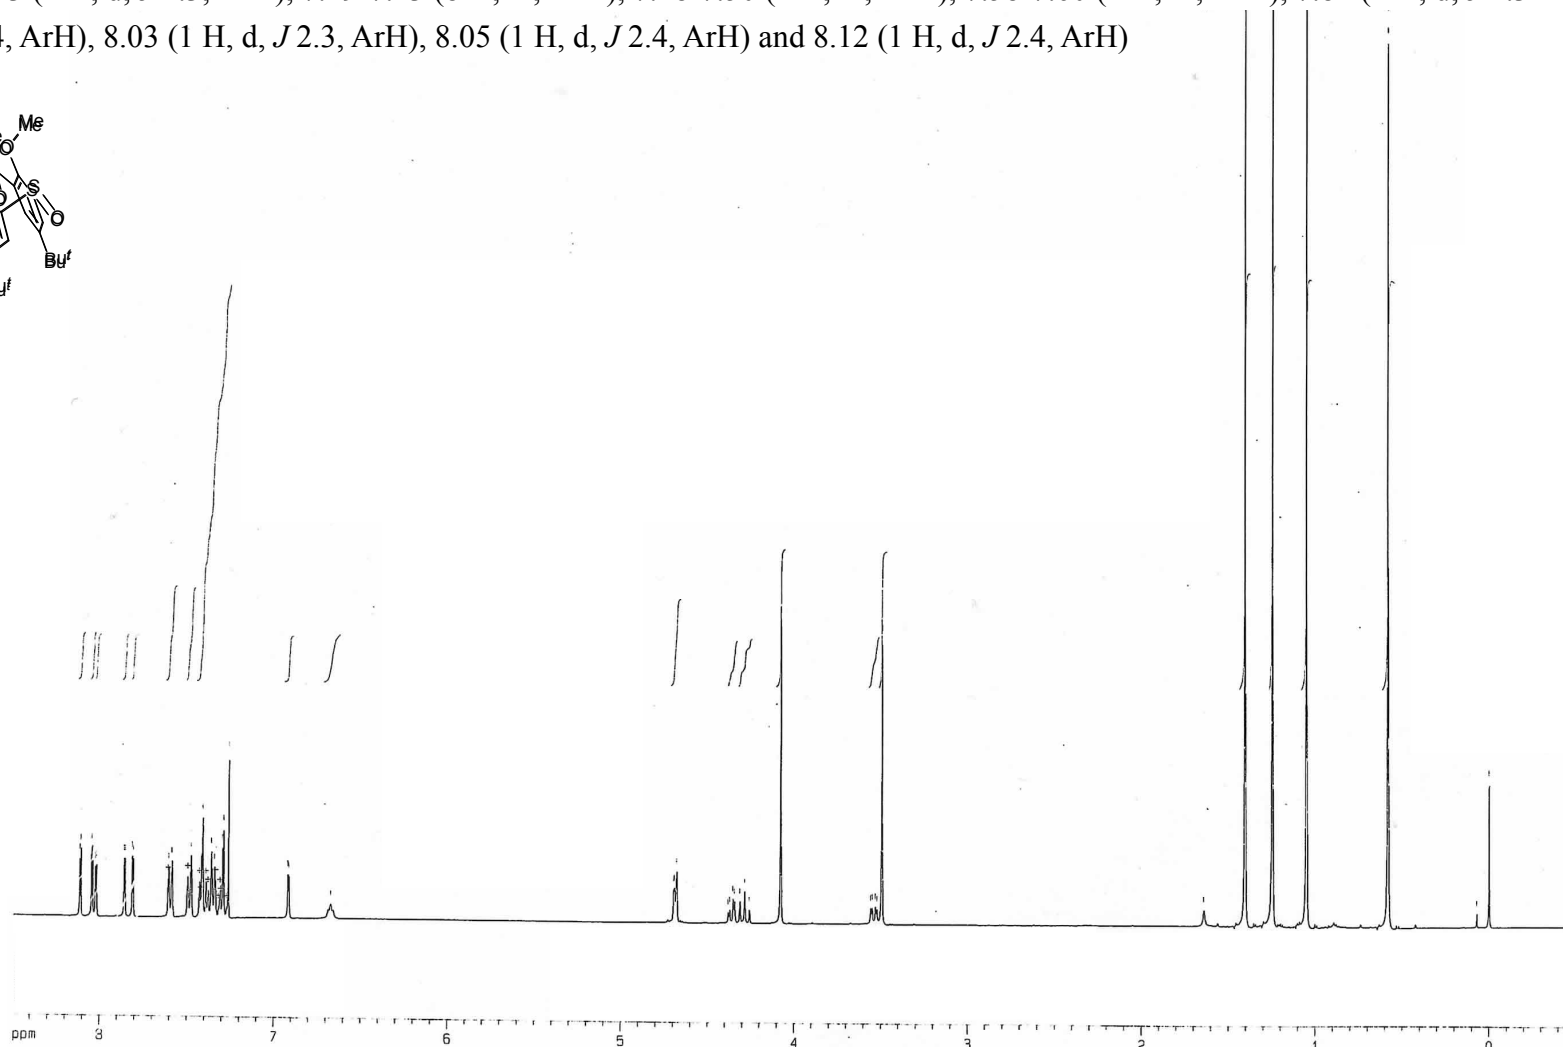

**25,26-Di(benzylamino)-27,28-dimethoxy-tetra-*p-tert*-butylsulfinylcalix[4]arene (7c)**

$\delta_C$  (100 MHz) 30.51, 30.75, 31.01, 31.37, 33.56, 34.57, 35.19, 35.66, 54.54, 56.15, 61.32, 63.29, 122.30, 123.83, 123.91, 124.34, 125.04, 125.67, 127.84, 127.91, 128.26, 128.87, 128.94, 129.11, 129.41, 130.00, 130.67, 131.90, 133.89, 136.01, 136.05, 137.65, 137.78, 138.41, 138.83, 139.25, 139.94, 144.45, 144.54, 146.25, 148.13, 149.66, 149.71 and 151.48

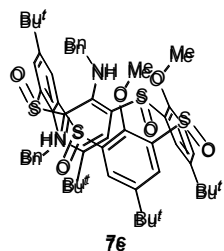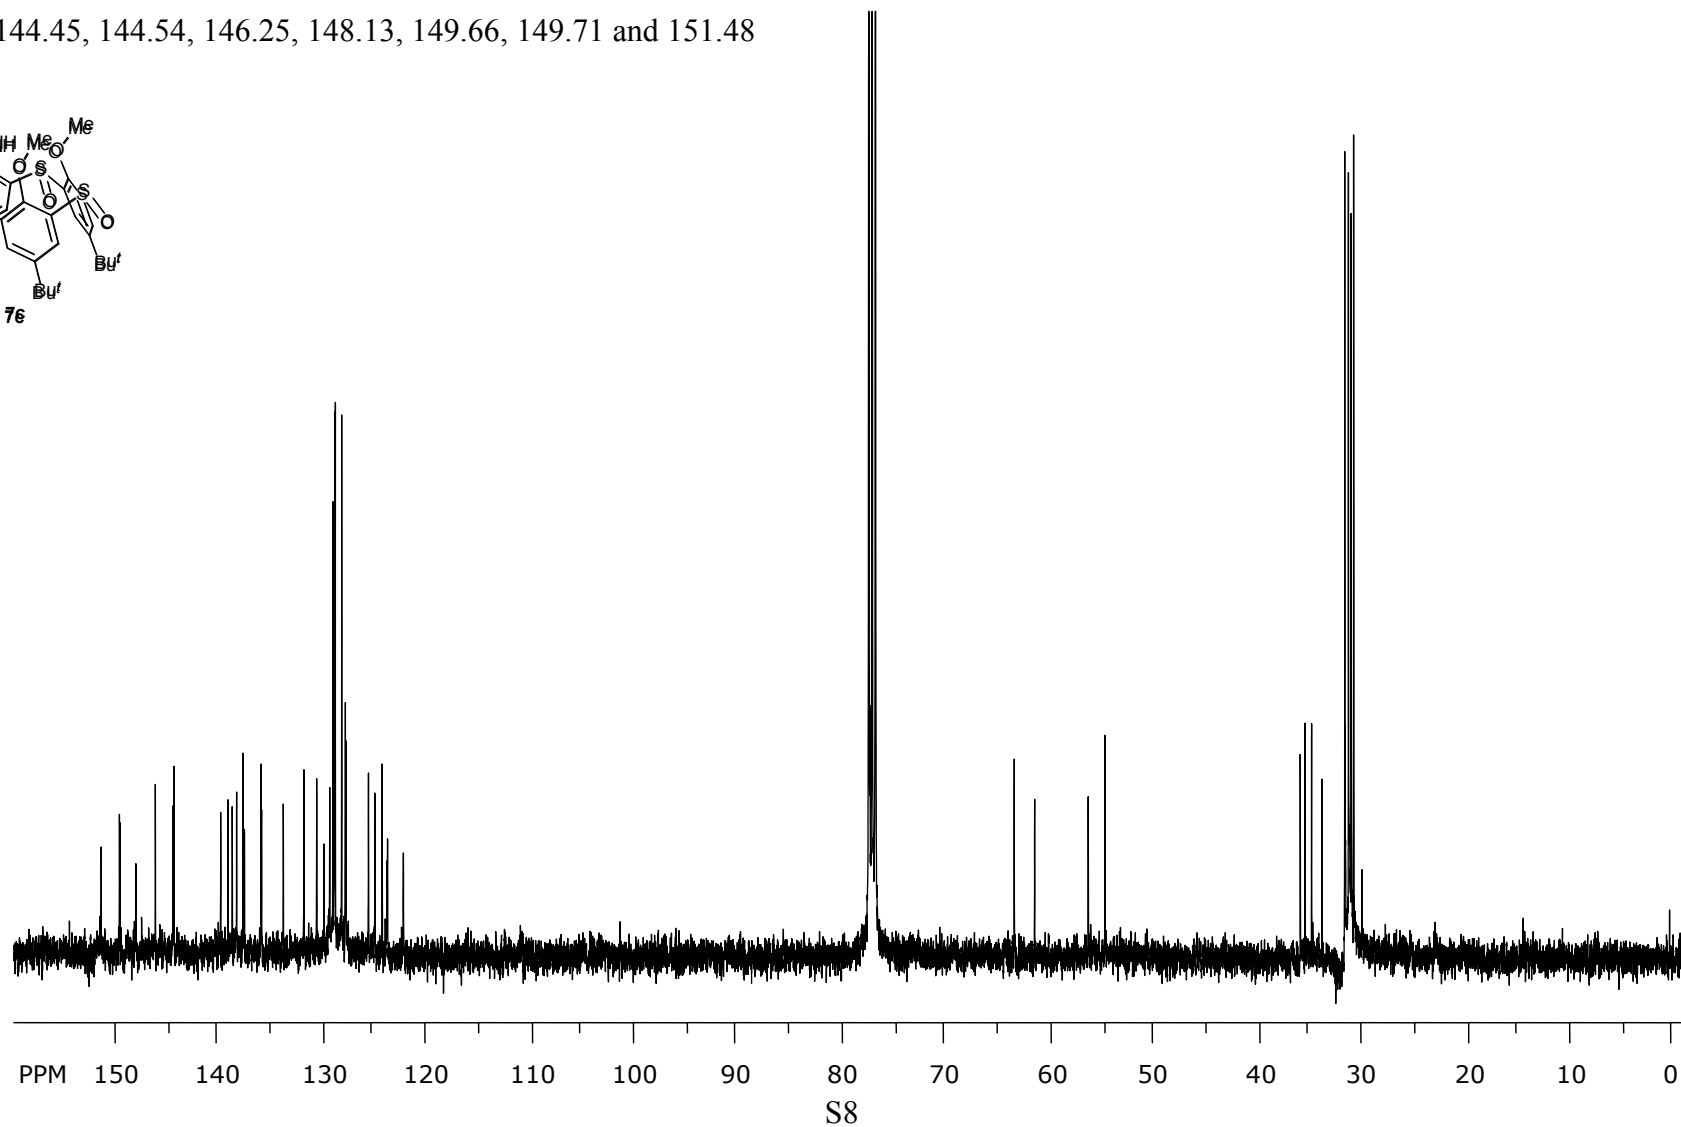



**4-tert-Butyl-2-(butylsulfinyl)-1-methoxybenzene (8)**

$\delta_{\text{H}}$  (400 MHz) 0.93 (3 H, t,  $J$  7.3 Hz,  $-\text{CH}_2\text{CH}_2\text{CH}_2\text{CH}_3$ ), 1.34 [9 H, s,  $\text{C}(\text{CH}_3)_3$ ], 1.39-1.52 (2 H, m,  $-\text{CH}_2\text{CH}_2\text{CH}_2\text{CH}_3$ ), 1.58-1.67 (1 H, m,  $-\text{CH}_2\text{CH}_2\text{CH}_2\text{CH}_3$ ), 1.80-1.91 (1 H, m,  $-\text{CH}_2\text{CH}_2\text{CH}_2\text{CH}_3$ ), 2.69-2.76 (1 H, m,  $-\text{CH}_2\text{CH}_2\text{CH}_2\text{CH}_3$ ), 3.01-3.08 (1 H, m,  $-\text{CH}_2\text{CH}_2\text{CH}_2\text{CH}_3$ ), 3.86 (3 H, s,  $-\text{OCH}_3$ ), 6.85 (1 H, d,  $J$  8.6 Hz, ArH), 7.43 (1 H, dd,  $J$  8.6 and 2.4 Hz, ArH) and 7.80 (1 H, d,  $J$  2.4 Hz, ArH)

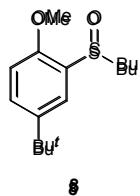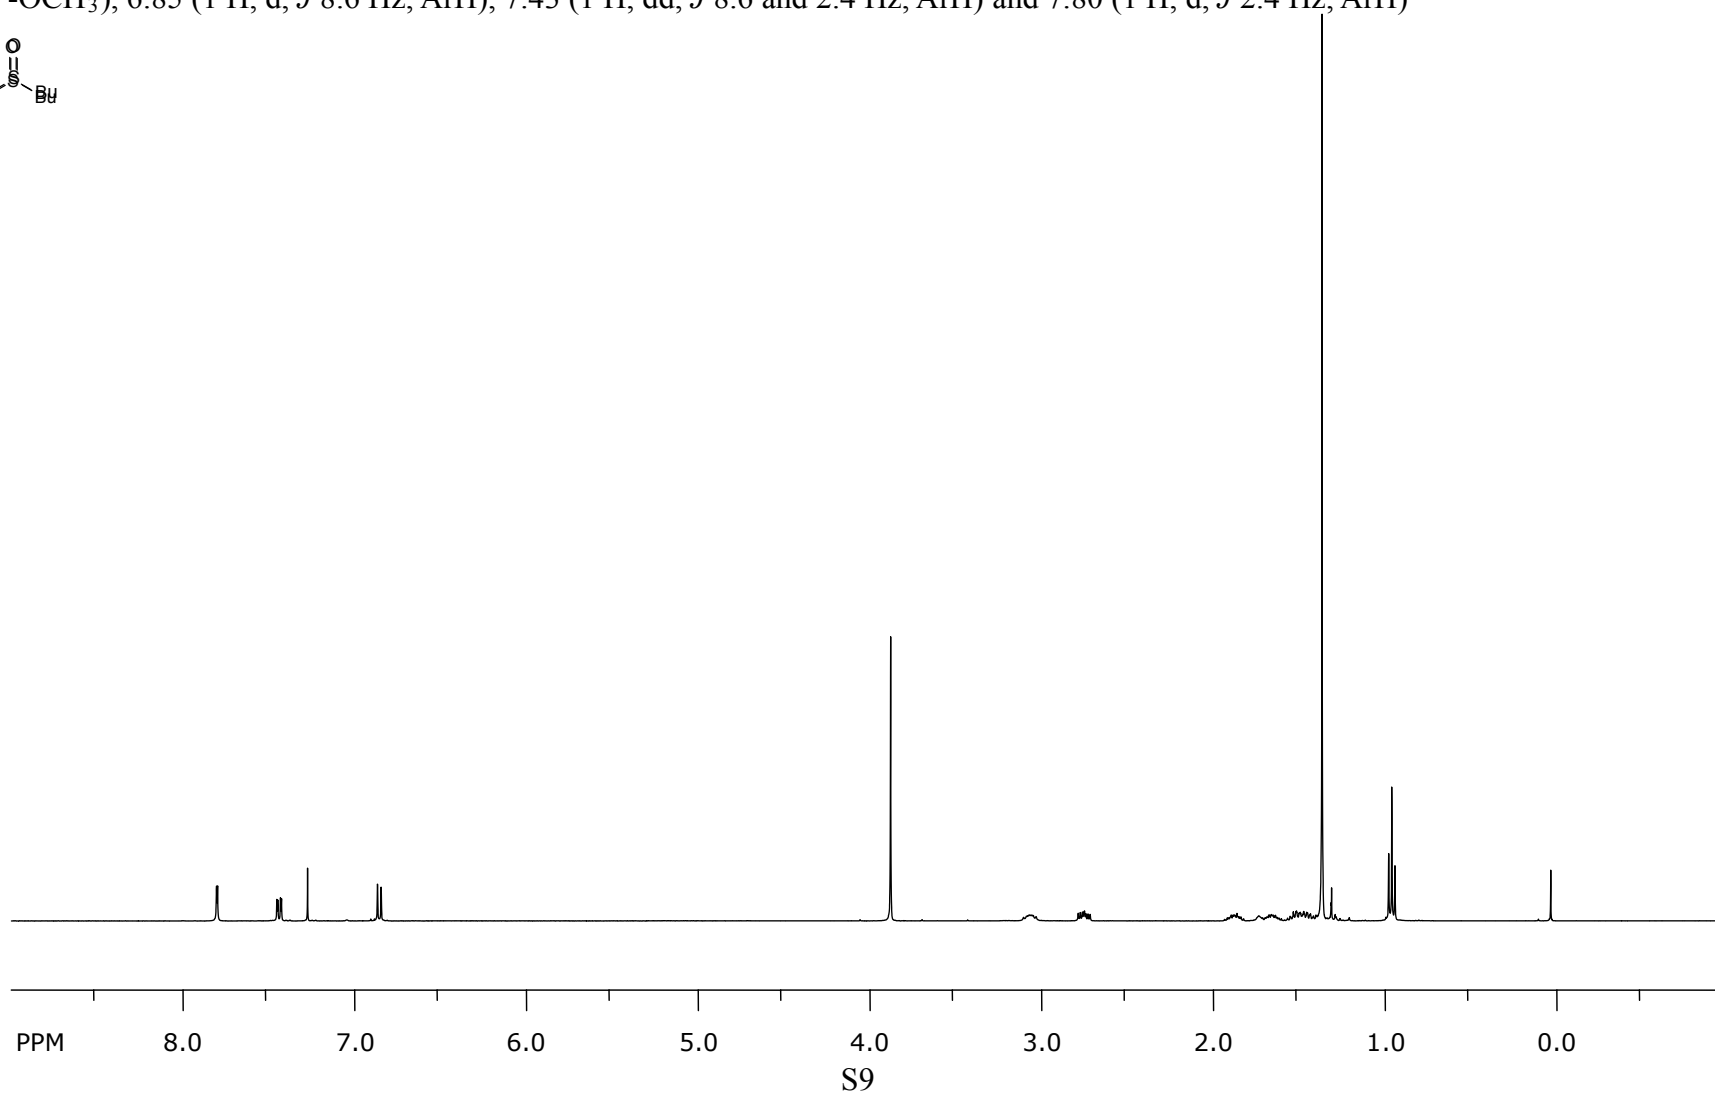

**4-*tert*-Butyl-2-(butylsulfinyl)-1-methoxybenzene (8)**

$\delta_C$  (125 MHz) 13.77, 21.98, 24.39, 31.52, 34.74, 53.84, 55.83, 110.30, 122.19, 128.51, 130.59, 144.87 and 152.84

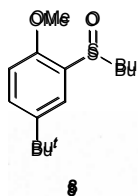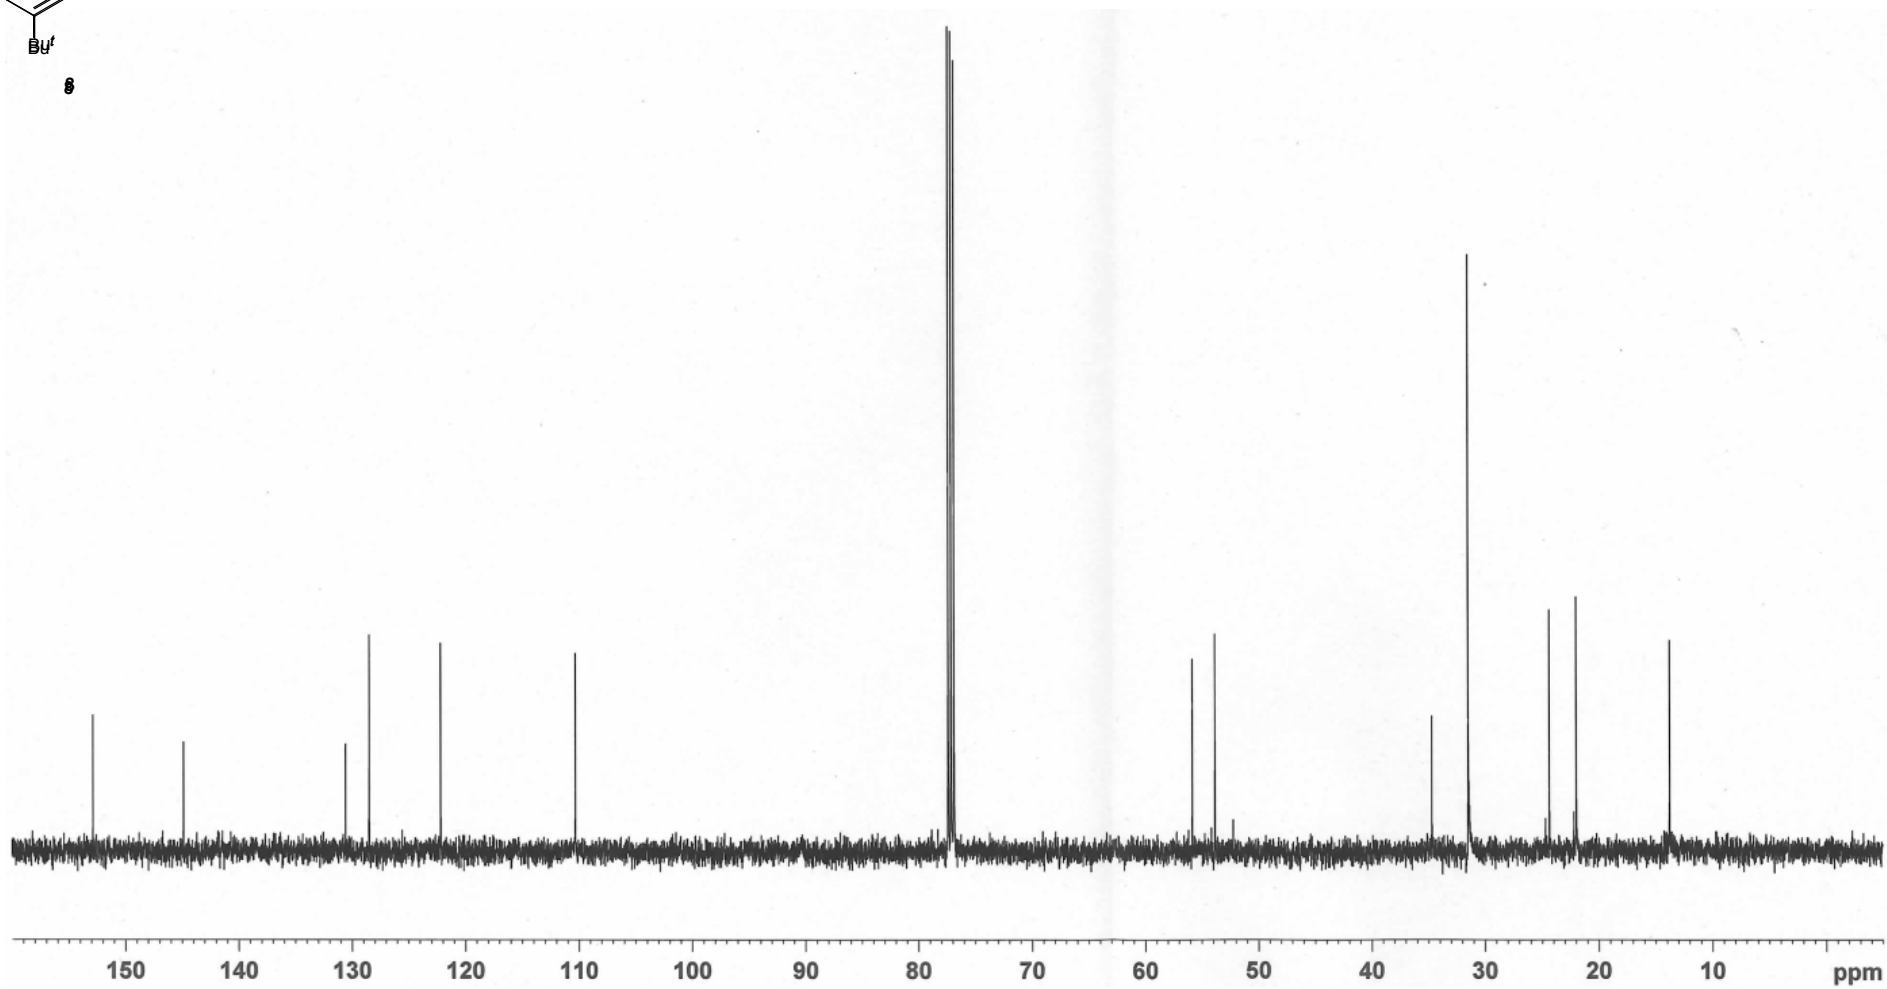

**25,27-Diamino-26,28-dimethoxy-tetra-*p-tert*-butylsulfinylcalix[4]arene (9b)**

$\delta_{\text{H}}$  (500 MHz) 1.03 [18 H, s, C(CH<sub>3</sub>)<sub>3</sub> × 2], 1.45 [18 H, s, C(CH<sub>3</sub>)<sub>3</sub> × 2], 3.72 (6 H, s, OCH<sub>3</sub> × 2), 5.23 (4 H, s, NH<sub>2</sub> × 2), 7.24 (4 H, s, ArH × 2) and 8.16 (4 H, s, ArH × 2)

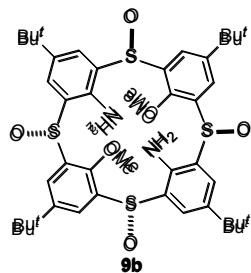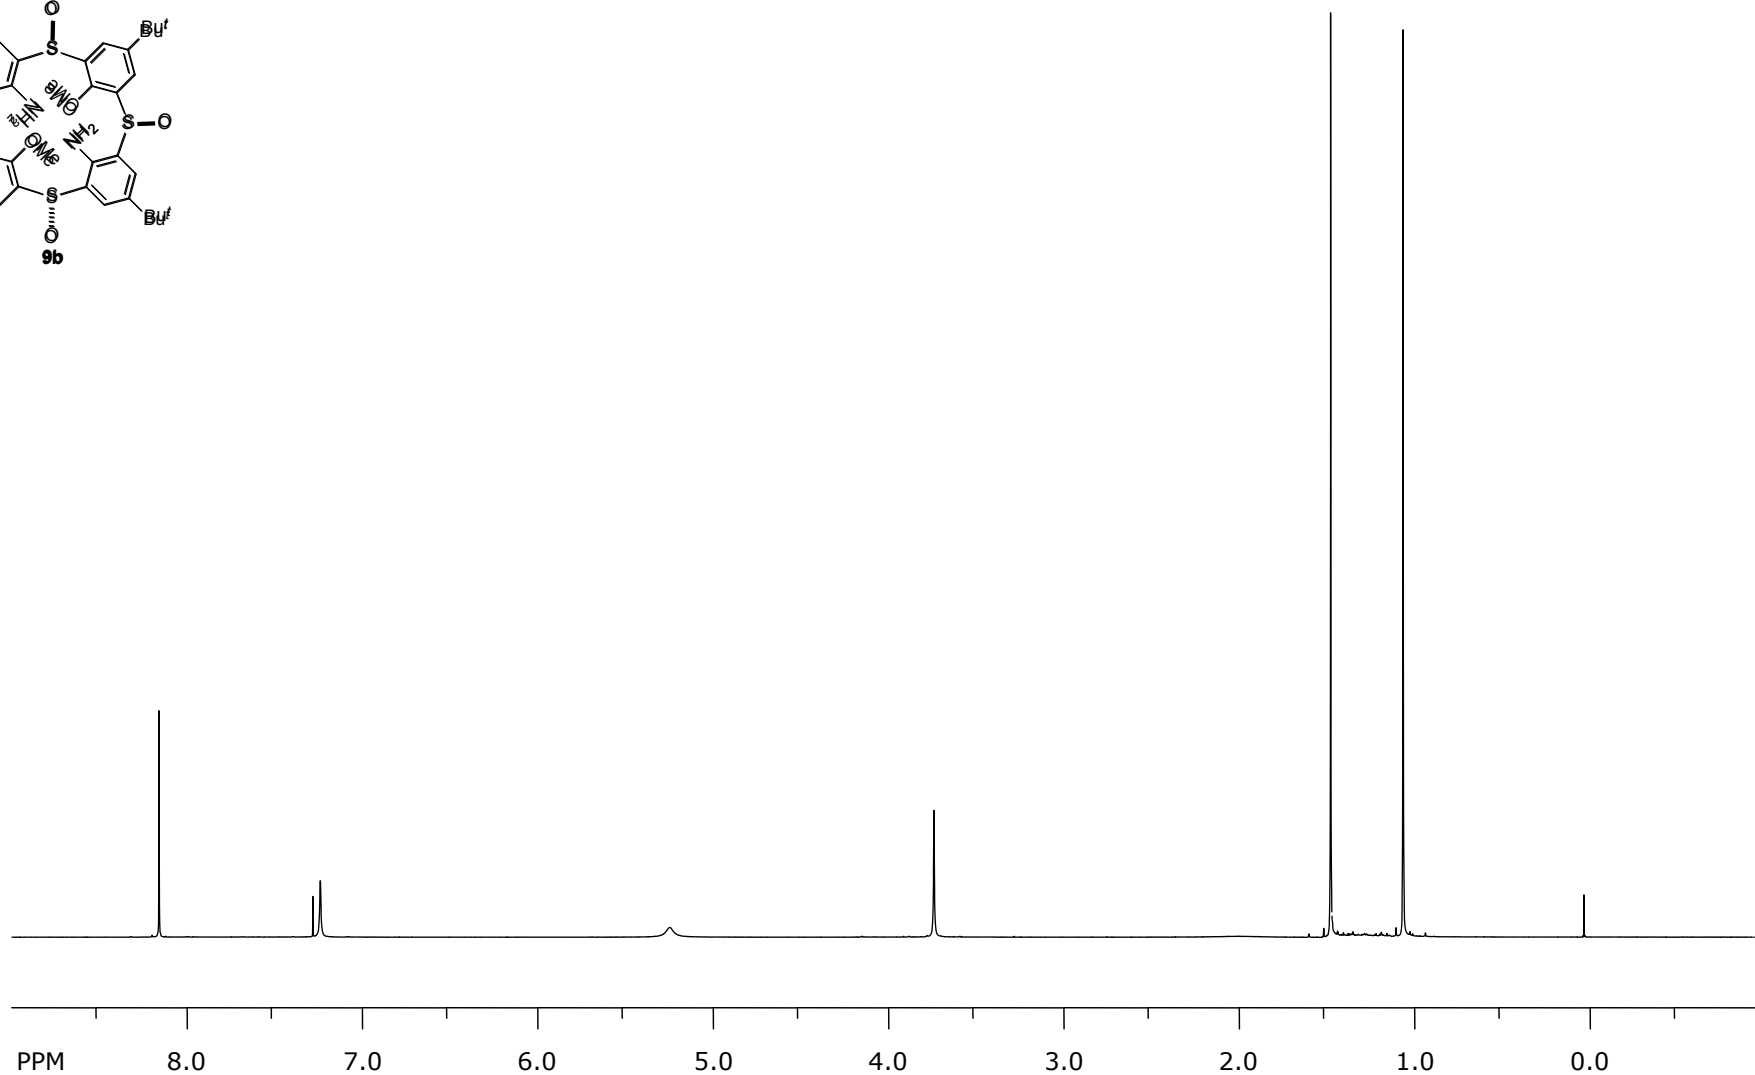

**25,27-Diamino-26,28-dimethoxy-tetra-*p-tert*-butylsulfinylcalix[4]arene (9b)**

$\delta_C$  (125 MHz) 30.84, 31.34, 33.99, 35.51, 61.53, 124.72, 126.66, 128.62, 135.93, 140.52, 143.71, 148.17 and 148.65

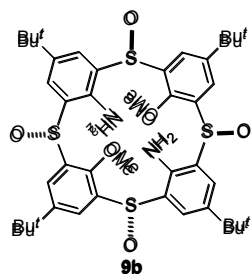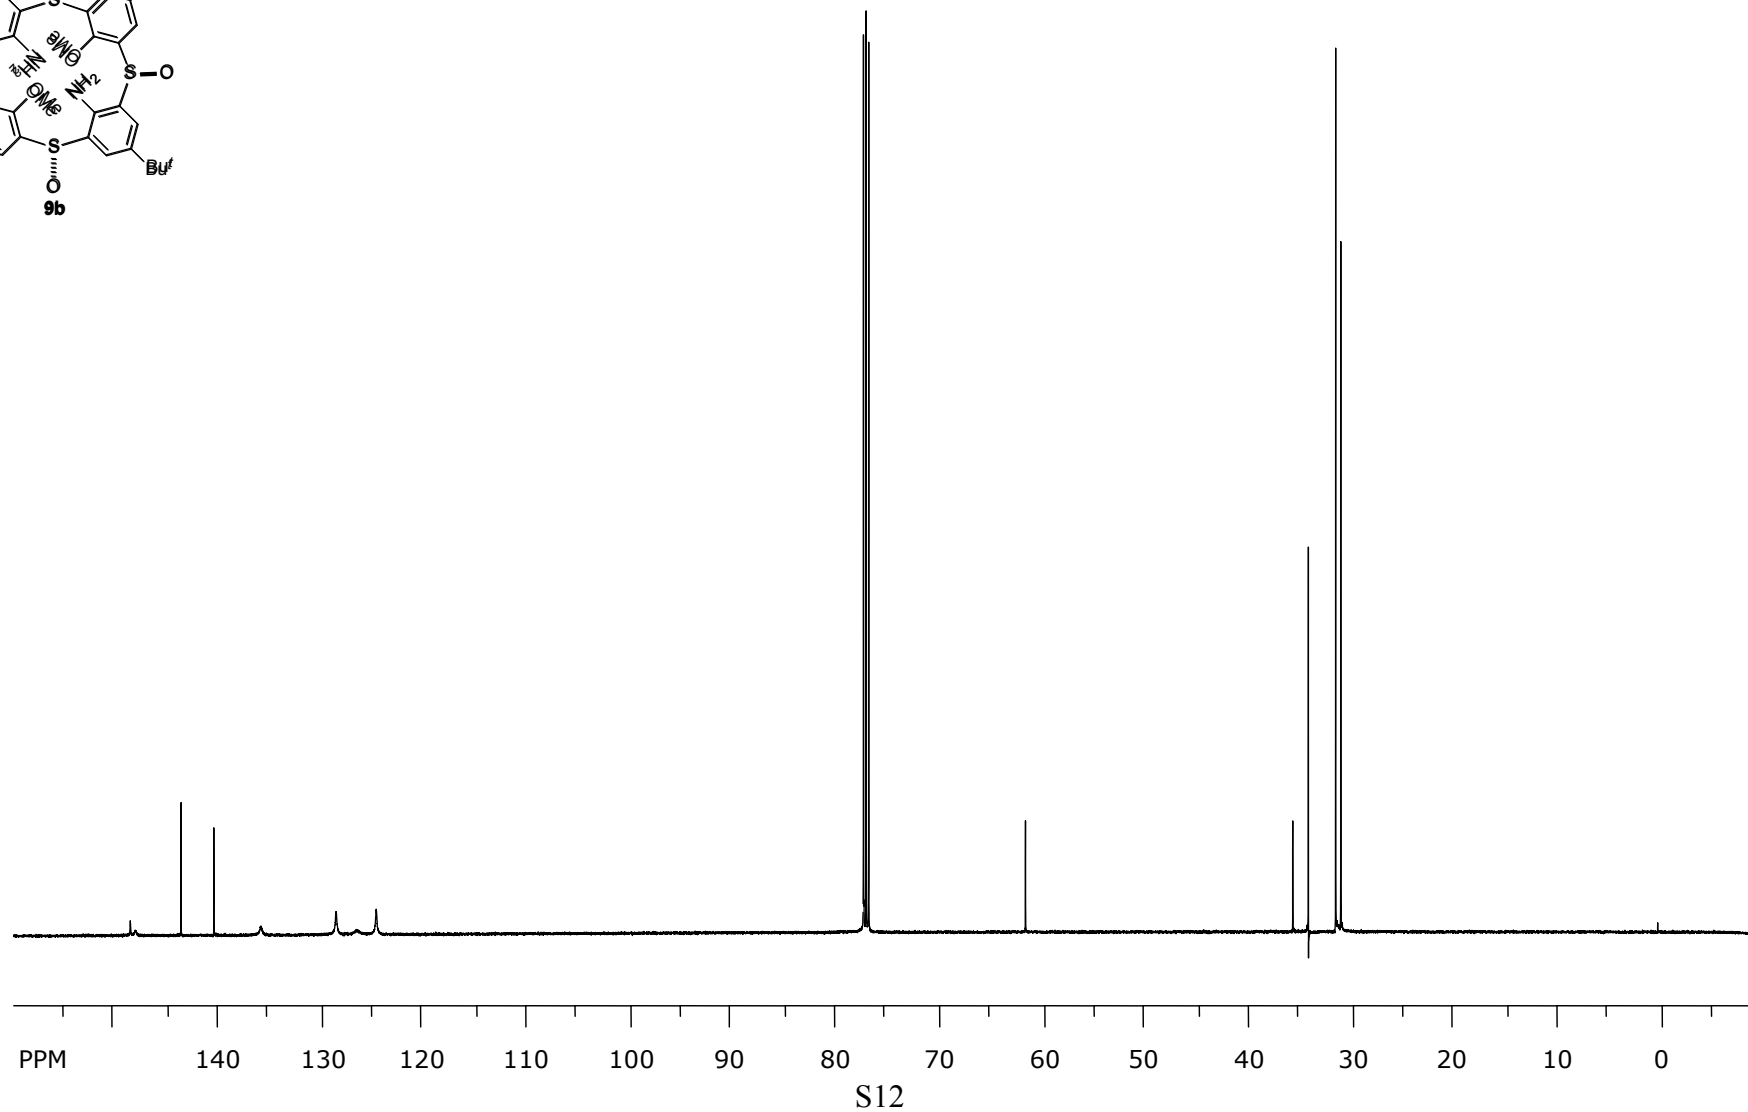

**25,26-Diamino-27,28-dimethoxy-tetra-*p-tert*-butylsulfinylcalix[4]arene (9c)**

$\delta_{\text{H}}$  (400 MHz, [ $^2\text{H}_2$ ]-1,1,2,2-tetrachloroethane, 383 K): 1.18 [18 H, s,  $\text{C}(\text{CH}_3)_3 \times 2$ ], 1.25 [18 H, s,  $\text{C}(\text{CH}_3)_3 \times 2$ ], 3.90 (6 H, s,  $\text{OCH}_3 \times 2$ ), 5.01 (4 H, s,  $\text{NH}_2 \times 2$ ), 7.45 (2 H, d,  $J$  2.2 Hz, ArH), 7.52 (2 H, br s, ArH), 7.75 (2 H, d,  $J$  2.2 Hz, ArH) and 7.91 (2 H, d,  $J$  2.2 Hz, ArH)

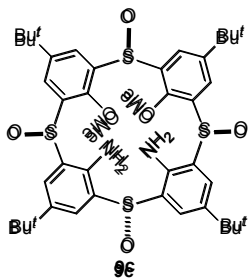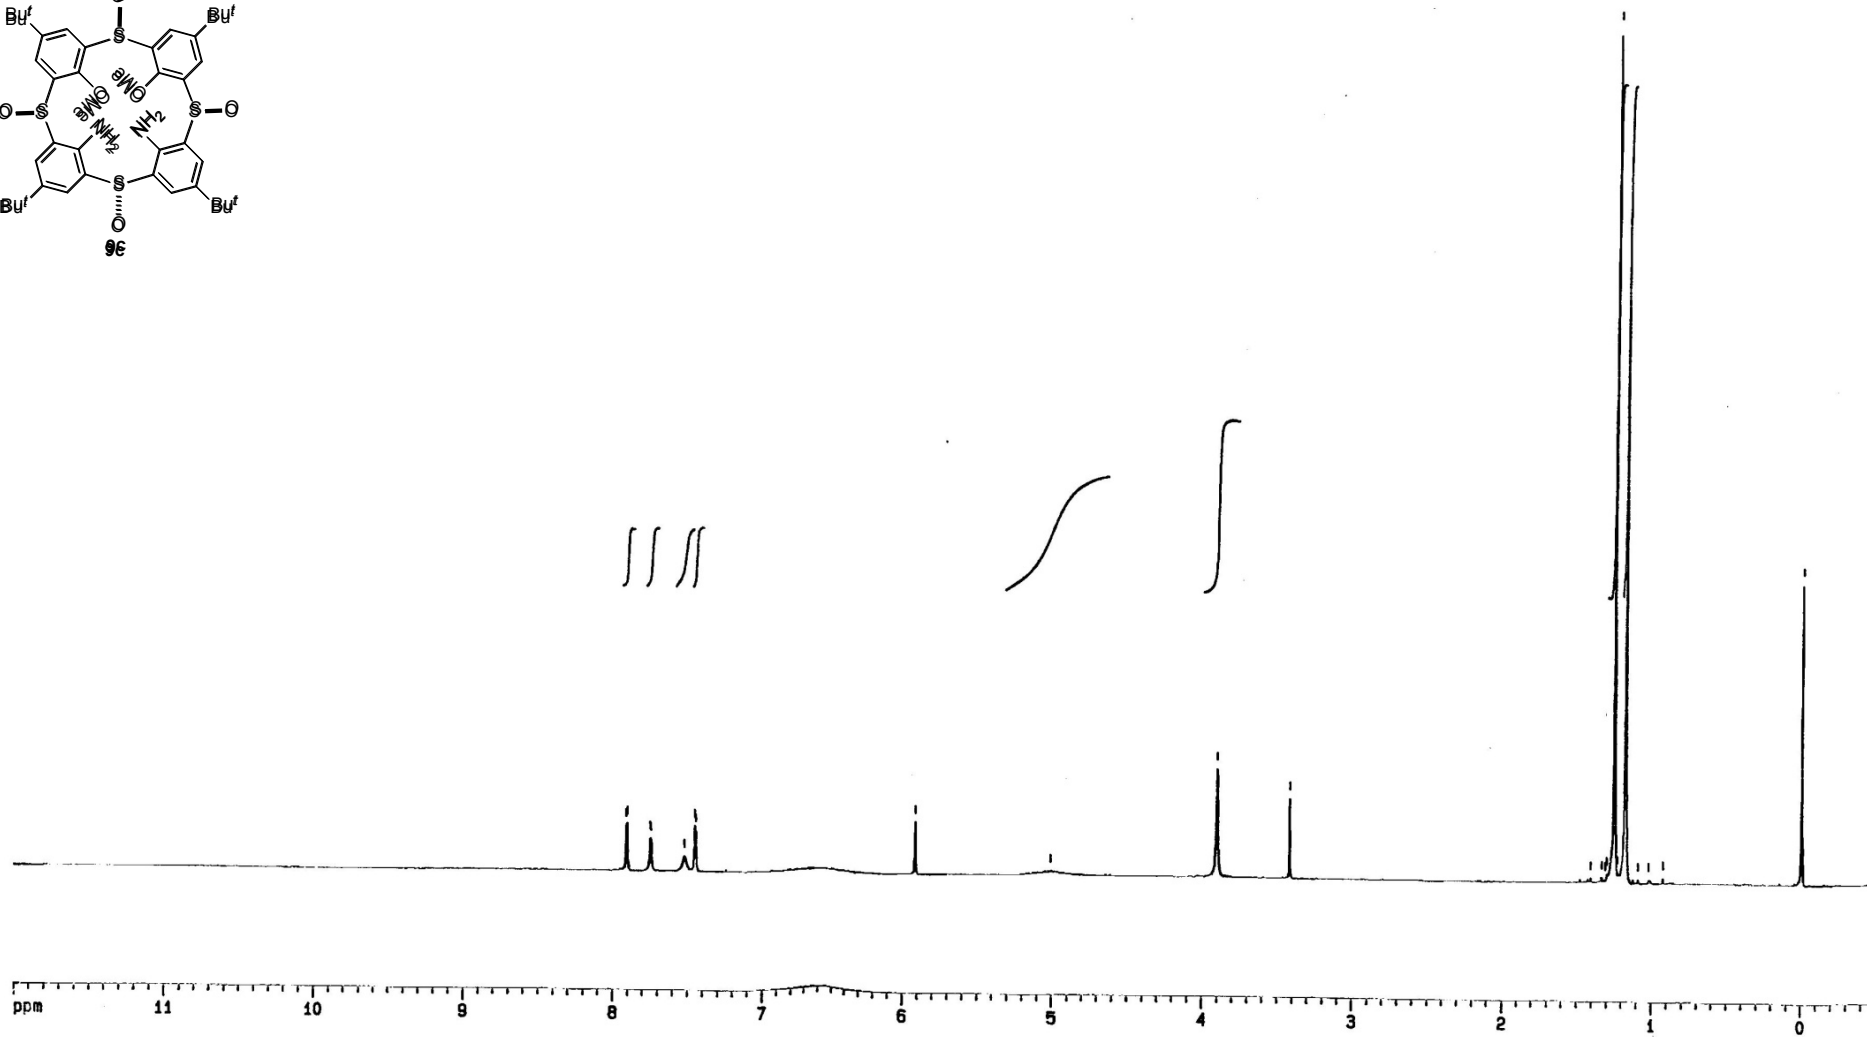

**25,26-Diamino-27,28-dimethoxy-tetra-*p-tert*-butylsulfinylcalix[4]arene (9c)**

$\delta_C$  (100 MHz,  $[\text{D}_2]$ -1,1,2,2-tetrachloroethane, 383 K): 31.13, 31.18, 34.23, 35.39, 62.99, 124.53, 124.65, 125.15, 127.24, 127.58, 128.80, 137.41, 138.92, 140.38, 142.86, 149.79 and 150.02

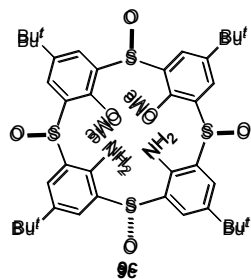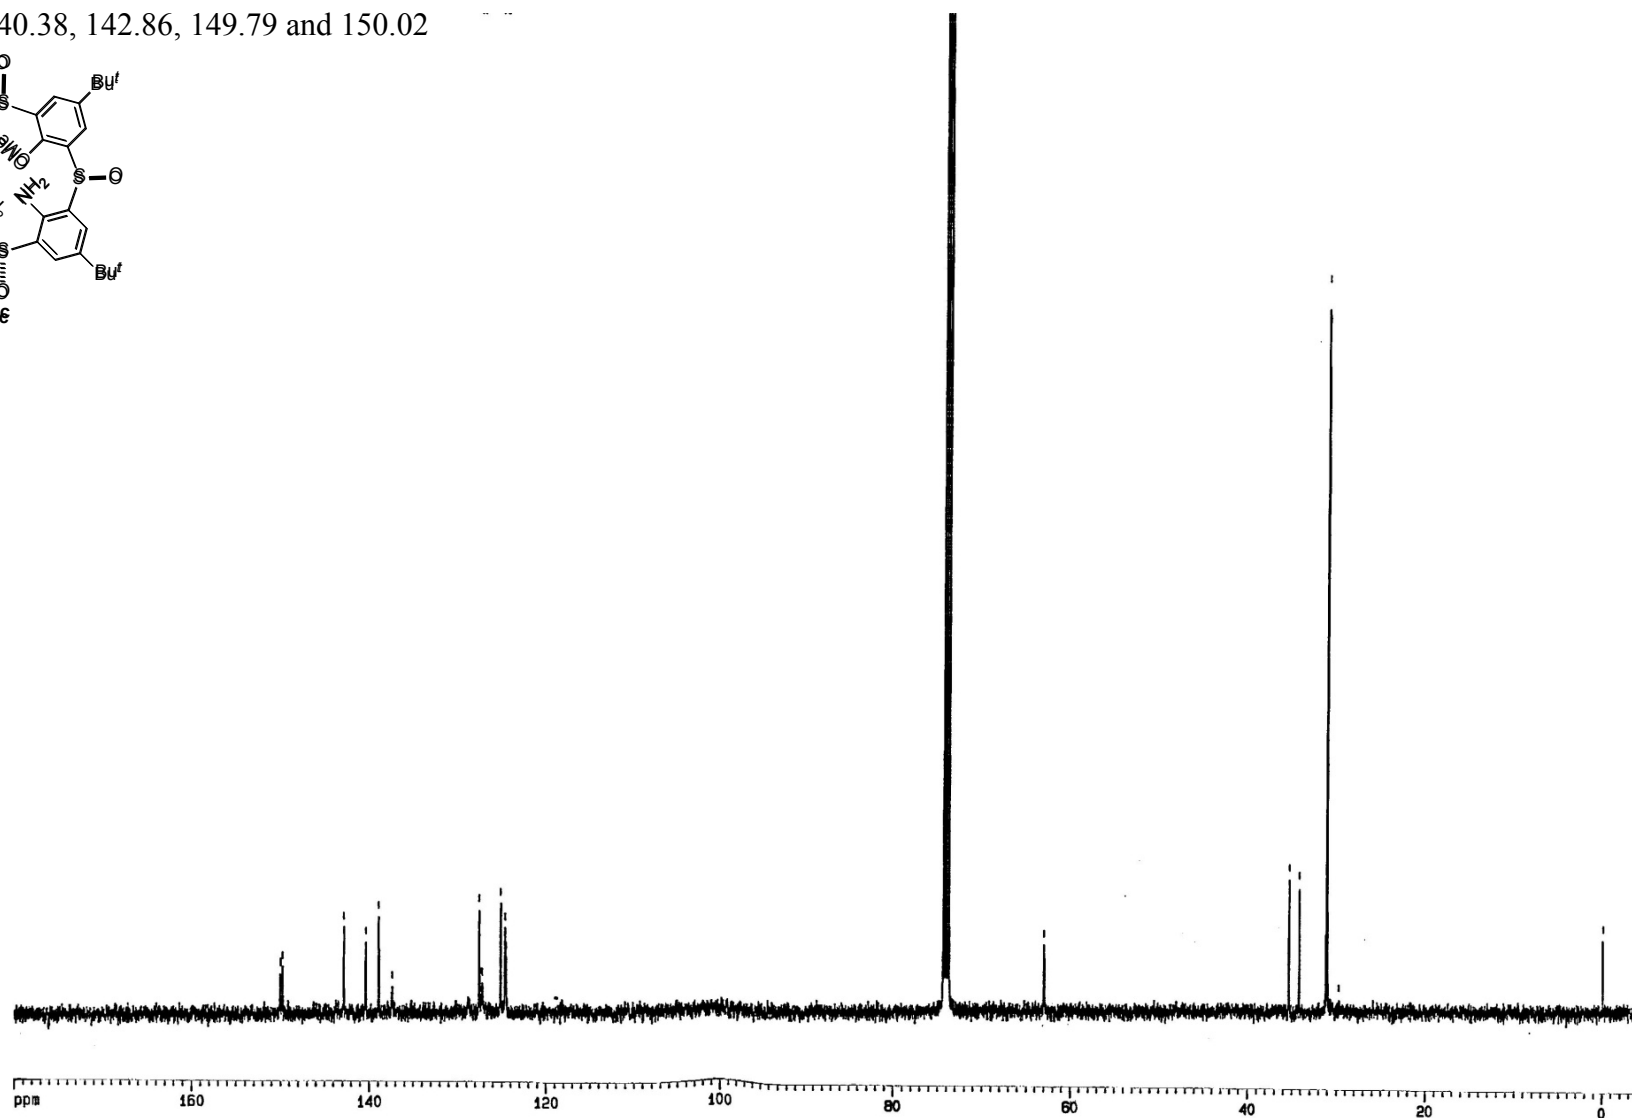

**25,27-Diamino-26,28-dihydroxy-tetra-*p*-*tert*-butylsulfinylcalix[4]arene (10b)**

$\delta_{\text{H}}$  (400 MHz,  $[\text{}^2\text{H}_6]\text{DMSO}$ , 353K)  $\delta$  (ppm): 1.05 [18 H, s,  $\text{C}(\text{CH}_3)_3 \times 2$ ], 1.34 [18 H, s,  $\text{C}(\text{CH}_3)_3 \times 2$ ], 7.37 (4 H, s, ArH  $\times 2$ ) and 7.84 (4 H, s, ArH  $\times 2$ )

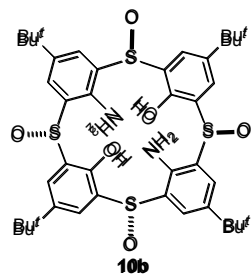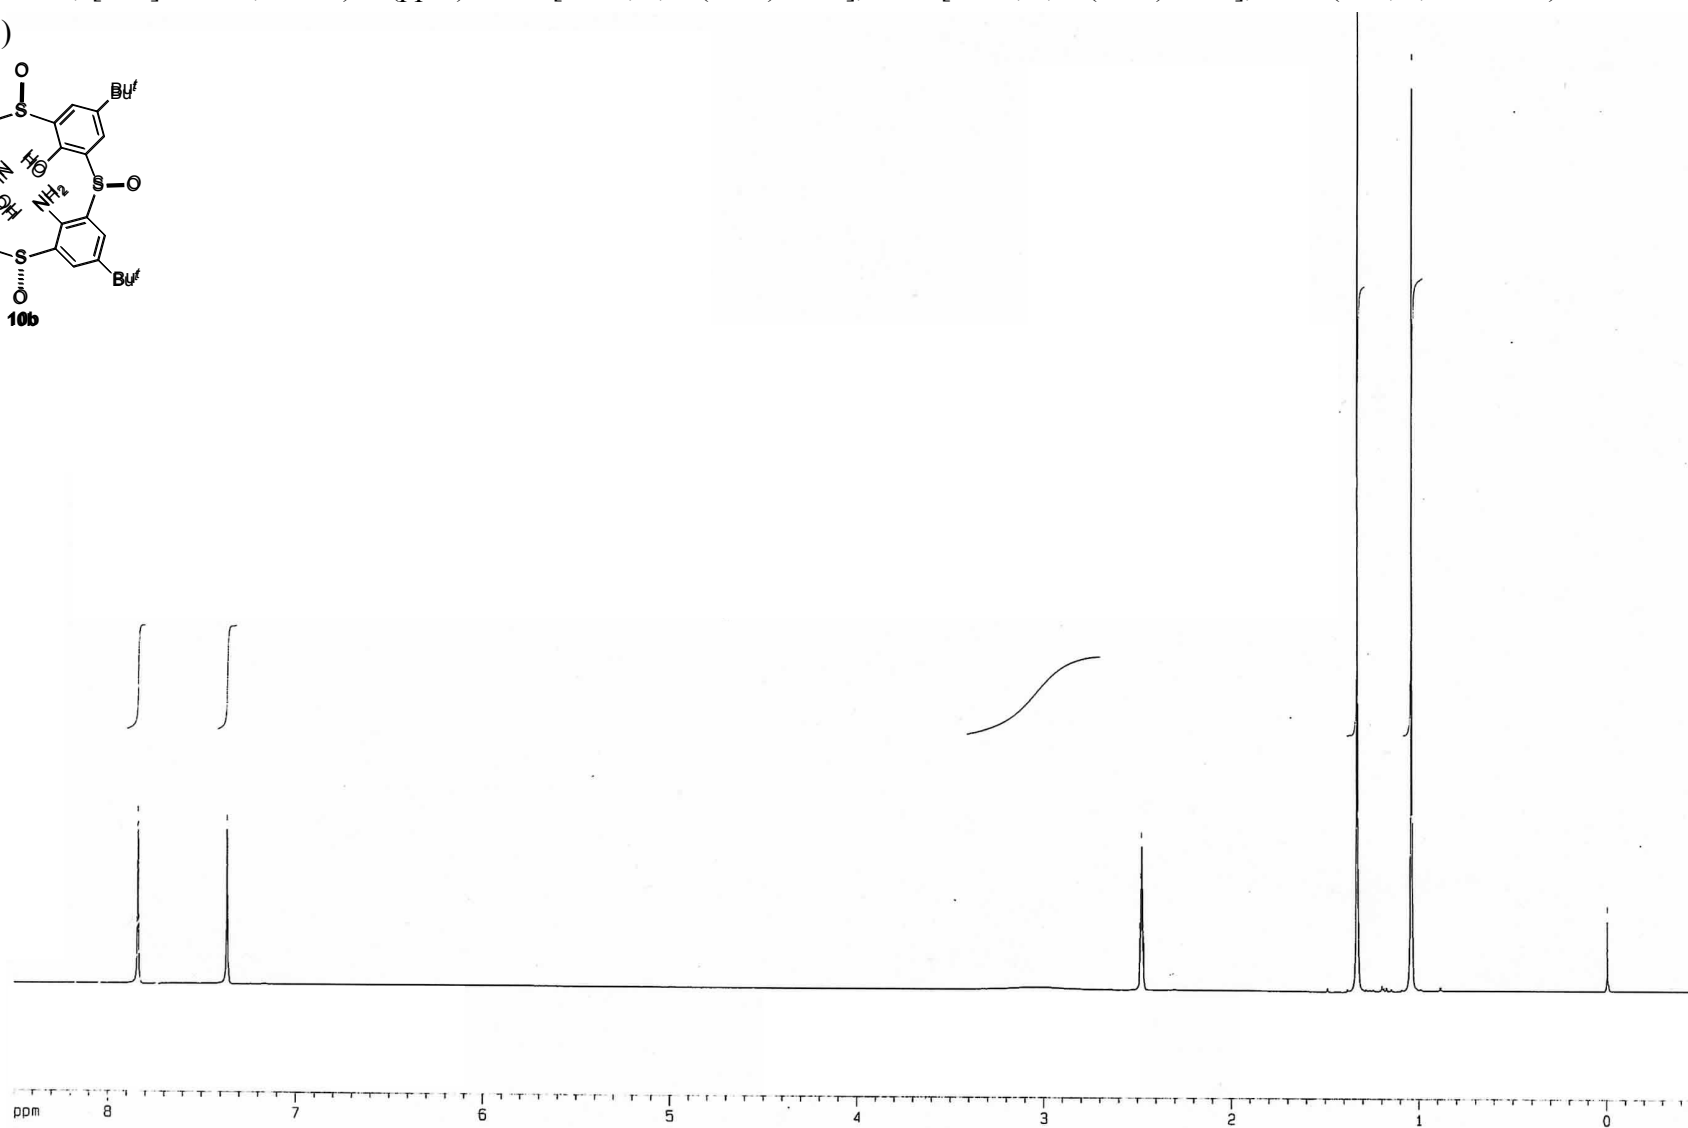

**25,27-Diamino-26,28-dihydroxy-tetra-*p-tert*-butylsulfinylcalix[4]arene (10b)**

$\delta_C$  (100 MHz,  $[\text{D}_6]\text{DMSO}$ , 353K)  $\delta$  (ppm): 30.24, 30.62, 33.27, 34.13, 122.93, 126.64, 127.66, 131.73, 138.55, 141.93, 142.90, 142.90 and 147.05

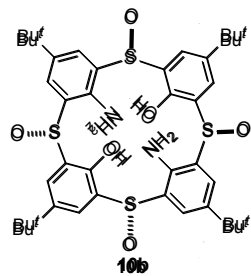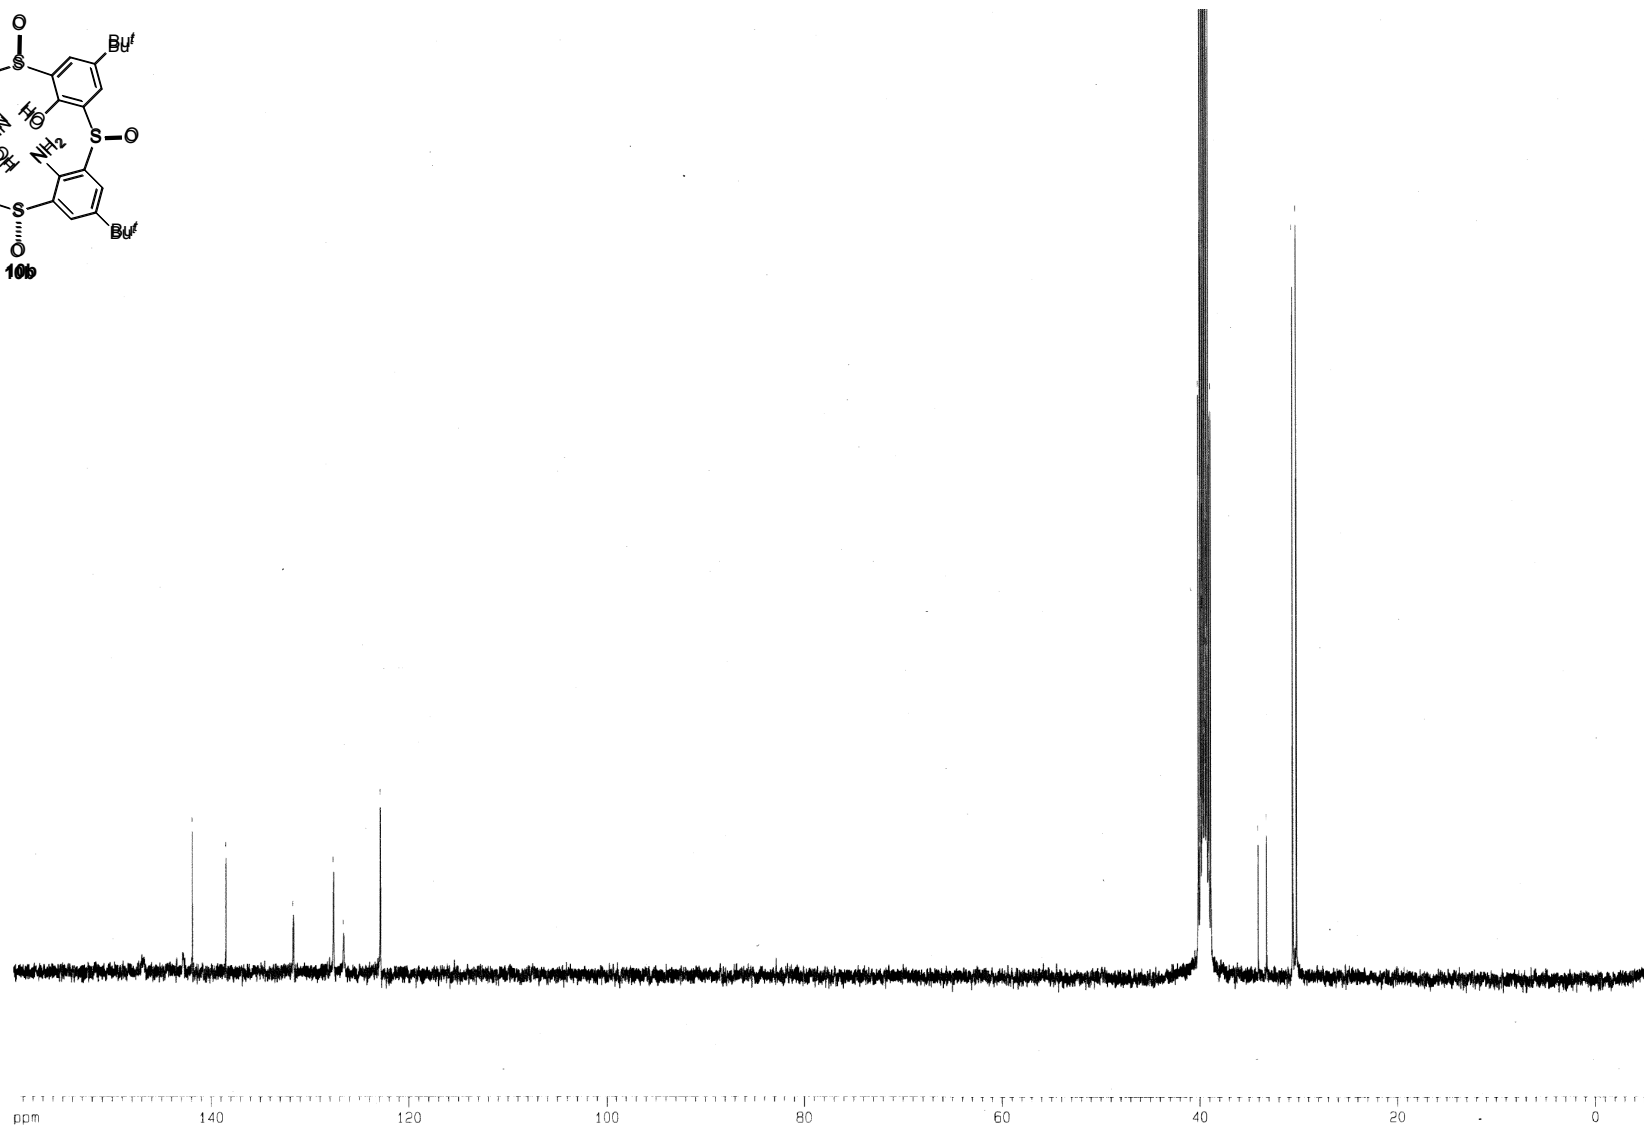



**25,26-Diamino-27,28-dihydroxy-tetra-*p*-*tert*-butylsulfinylcalix[4]arene (10c)**

$\delta_{\text{H}}$  (400 MHz, [ $^2\text{H}_6$ ]DMSO, 373 K)  $\delta$  (ppm): 1.08 [18 H, s,  $\text{C}(\text{CH}_3)_3 \times 2$ ], 1.25 [18 H, s,  $\text{C}(\text{CH}_3)_3 \times 2$ ], 6.72 (6 H, br,  $\text{NH}_2 \times 2$  and  $\text{OH} \times 2$ ), 7.34 (2 H, br, ArH), 7.46 (2 H, d,  $J$  2.3 Hz, ArH), 7.56 (2 H, d,  $J$  2.5 Hz, ArH) and 7.71 (2 H, d,  $J$  2.5 Hz, ArH)

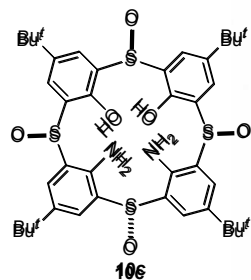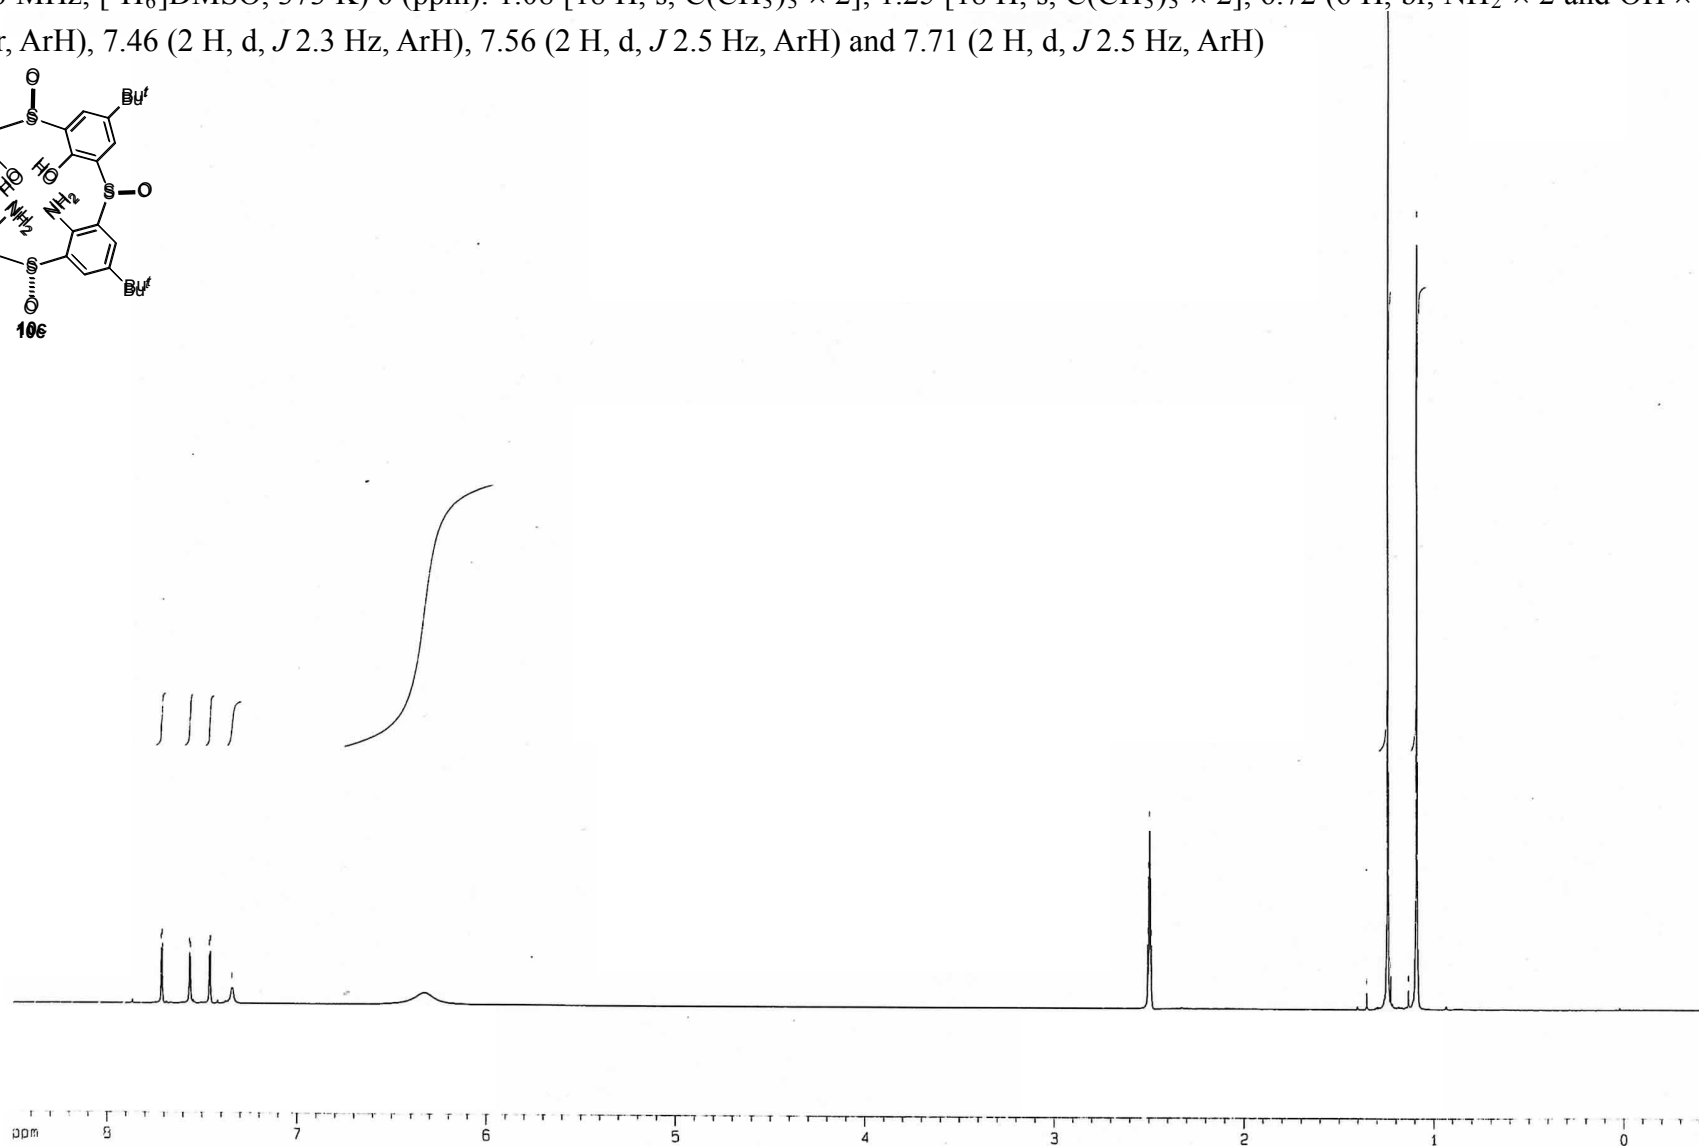

**25,26-Diamino-27,28-dihydroxy-tetra-*p*-*tert*-butylsulfinylcalix[4]arene (10c)**

$\delta_c$  (100 MHz, [ $^2\text{H}_6$ ]DMSO, 373 K)  $\delta$  (ppm): 30.11, 30.53, 33.34, 33.83, 121.64, 121.86, 124.29, 125.26, 126.27, 132.34, 132.70, 139.08, 140.77, 142.77, 142.98, 145.80 and 151.21

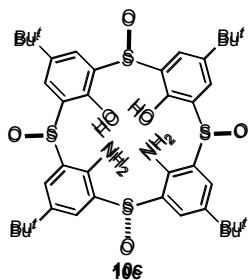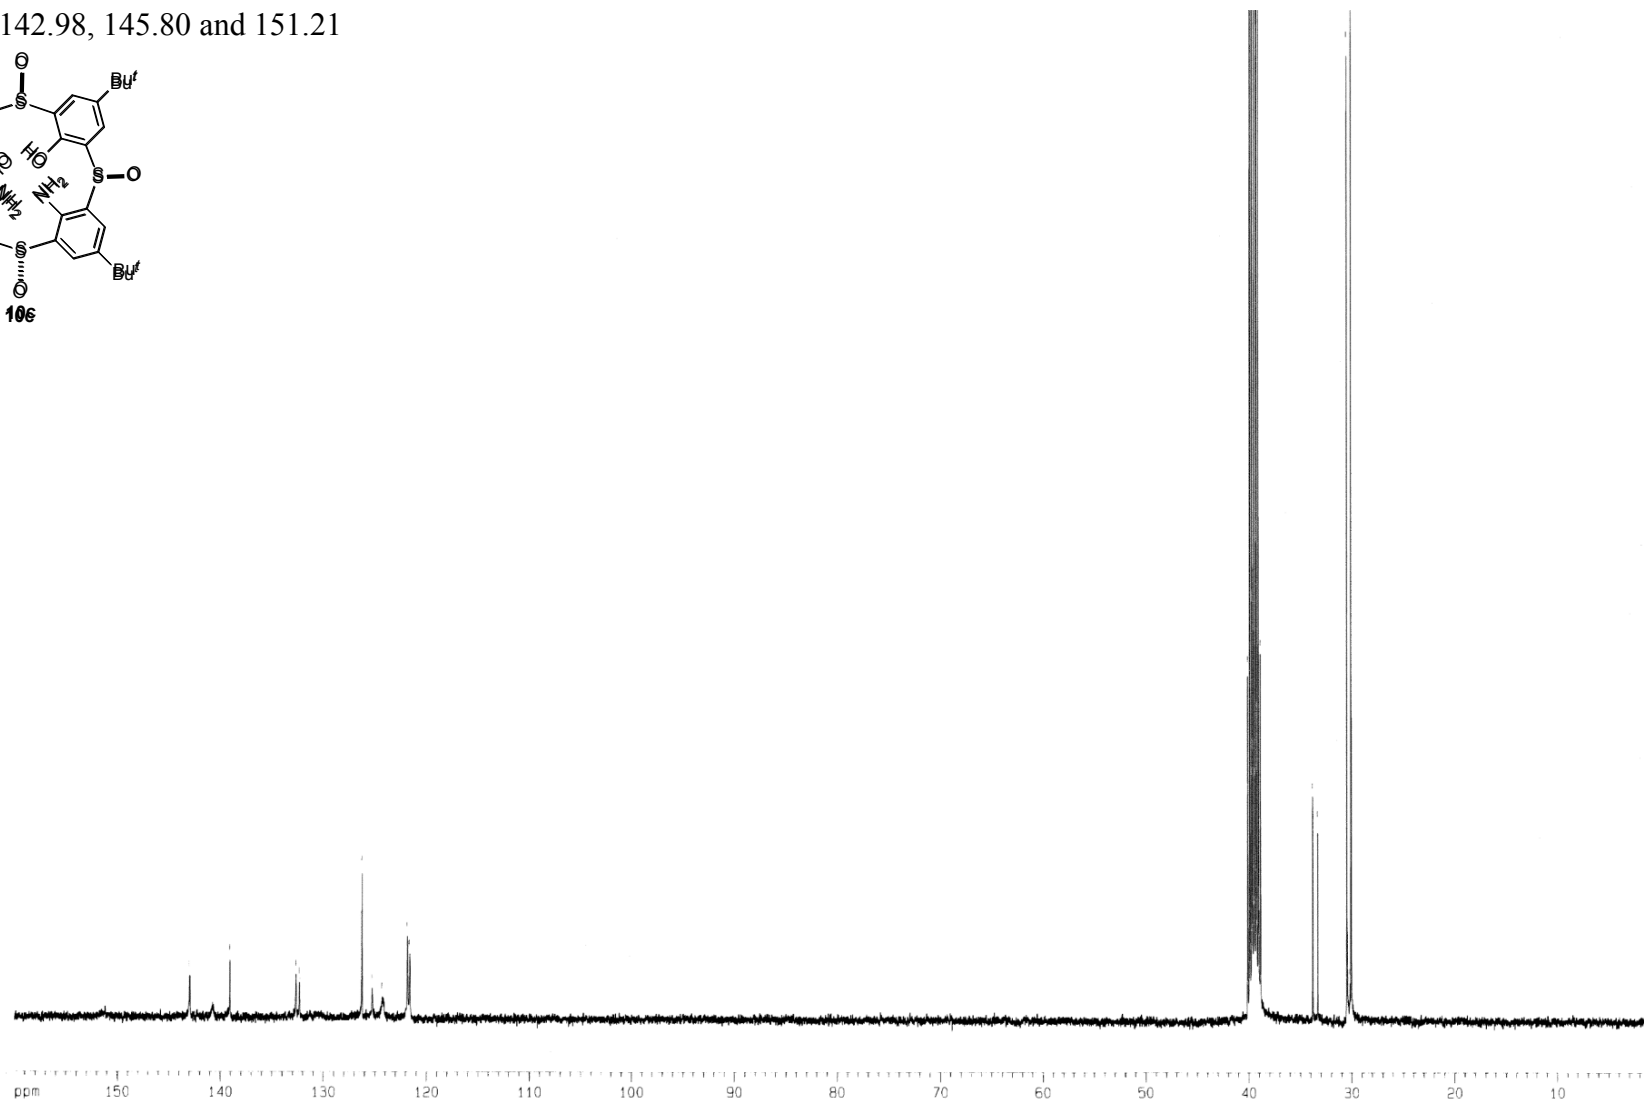

**25,27-Diamino-26,28-dihydroxy-tetra-*p*-*tert*-butylthiacalix[4]arene (5b)**

$\delta_{\text{H}}$  (400 MHz) 1.13 [18 H, s, C(CH<sub>3</sub>)<sub>3</sub> × 2], 1.25 [18 H, s, C(CH<sub>3</sub>)<sub>3</sub> × 2], 7.49 (4 H, s, ArH × 2) and 7.61 (4 H, s, ArH × 2)

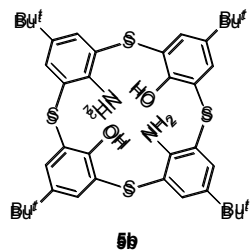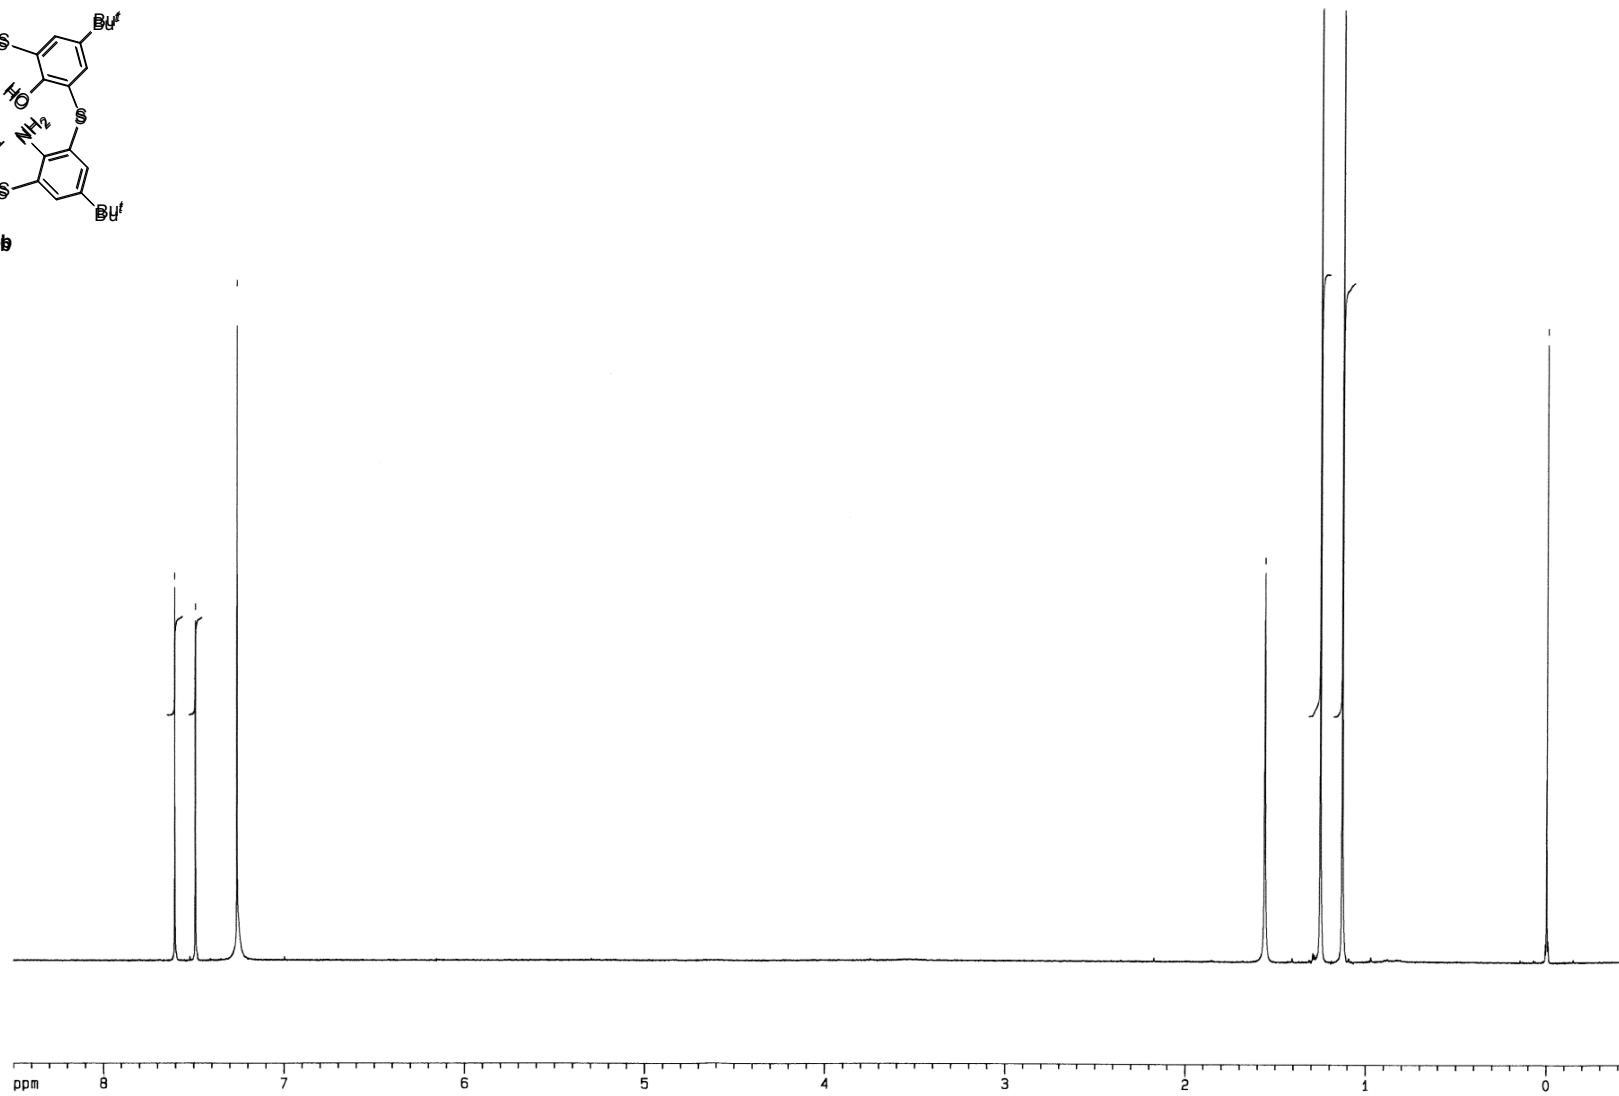

**25,27-Diamino-26,28-dihydroxy-tetra-*p*-*tert*-butylthiacalix[4]arene (5b)**

$\delta_C$  (100 MHz) 31.05, 31.39, 34.04, 34.14, 121.60, 123.89, 134.79, 135.41, 142.85, 145.31, 146.42 and 157.21

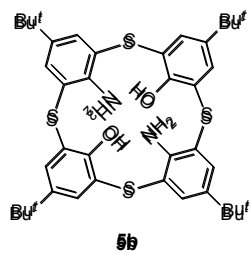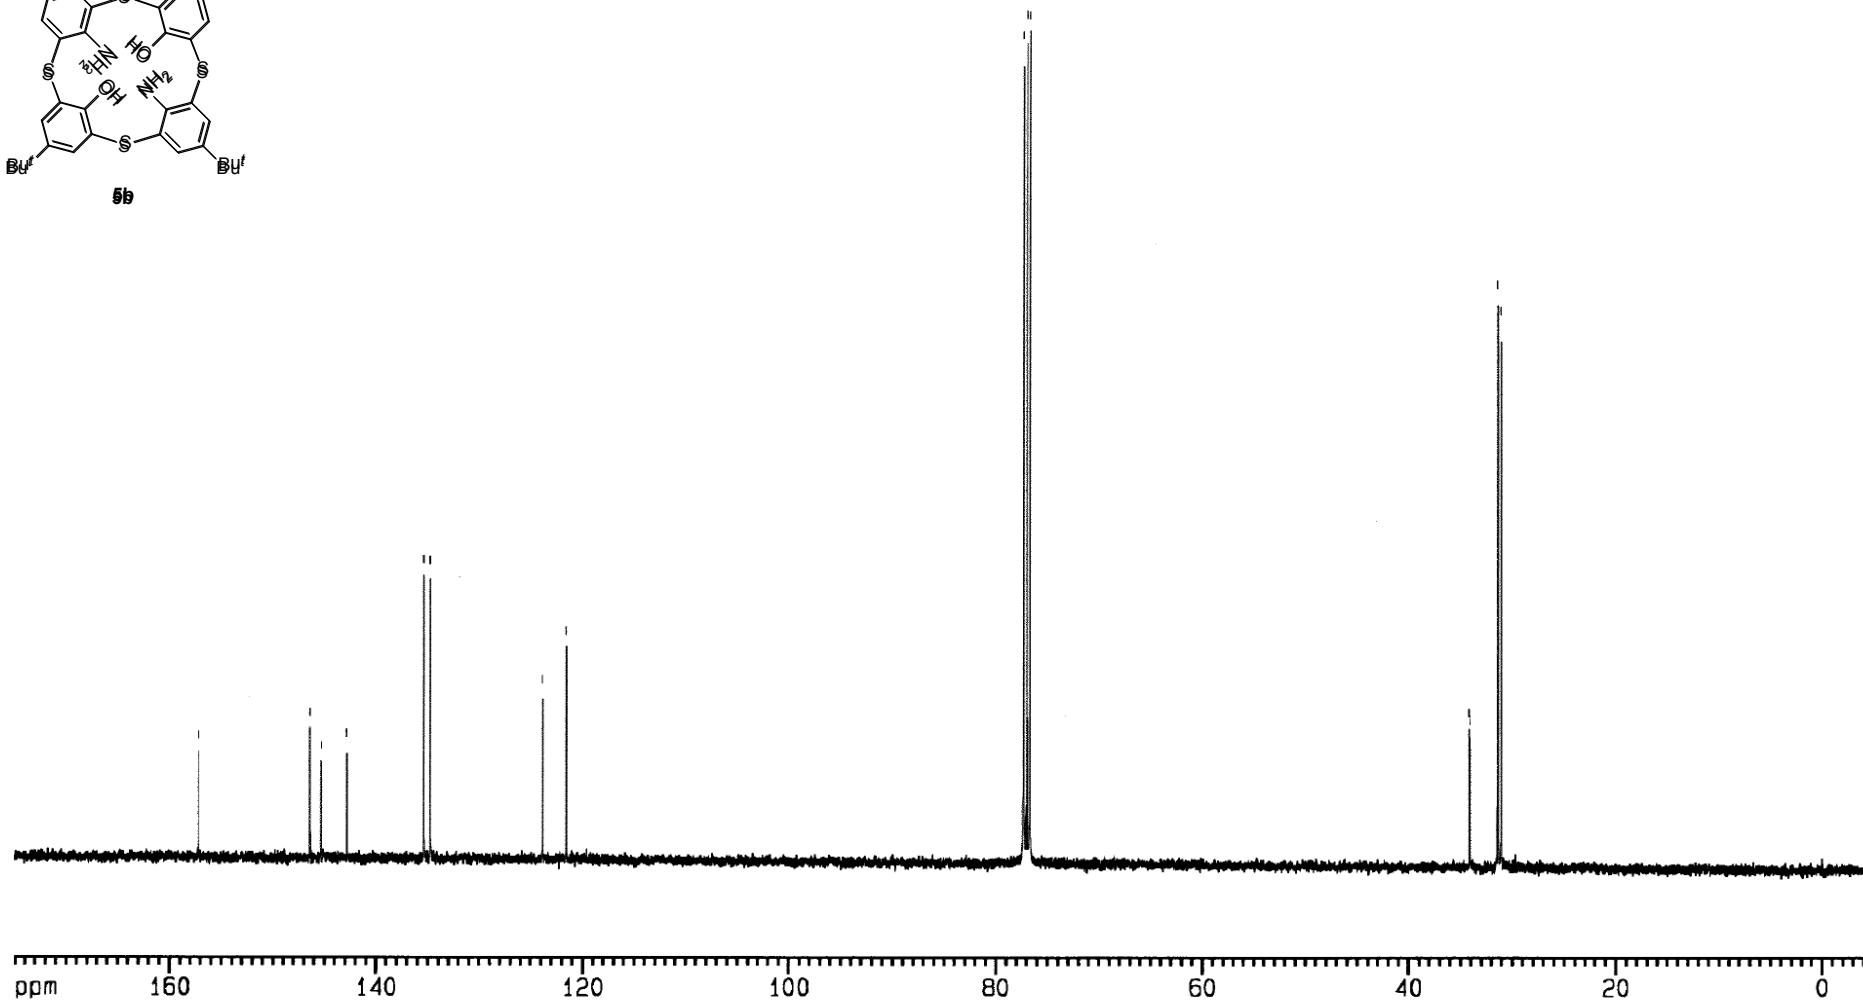

**25,26-Diamino-27,28-dihydroxy-tetra-*p*-*tert*-butylthiacalix[4]arene (5c)**

$\delta_{\text{H}}$  (400 MHz) 1.14 [18 H, s, C(CH<sub>3</sub>)<sub>3</sub> × 2], 1.20 [18 H, s, C(CH<sub>3</sub>)<sub>3</sub> × 2], 6.32 (6 H, br, NH<sub>2</sub> × 2 and OH × 2), 7.39 (2 H, d, *J* 2.3 Hz, ArH), 7.47 (2 H, d, *J* 2.3 Hz, ArH), 7.49 (2 H, d, *J* 2.5 Hz, ArH), and 7.54 (2 H, d, *J* 2.5 Hz, ArH)

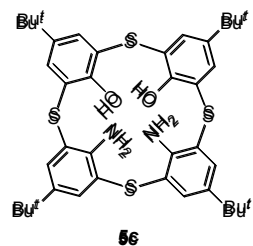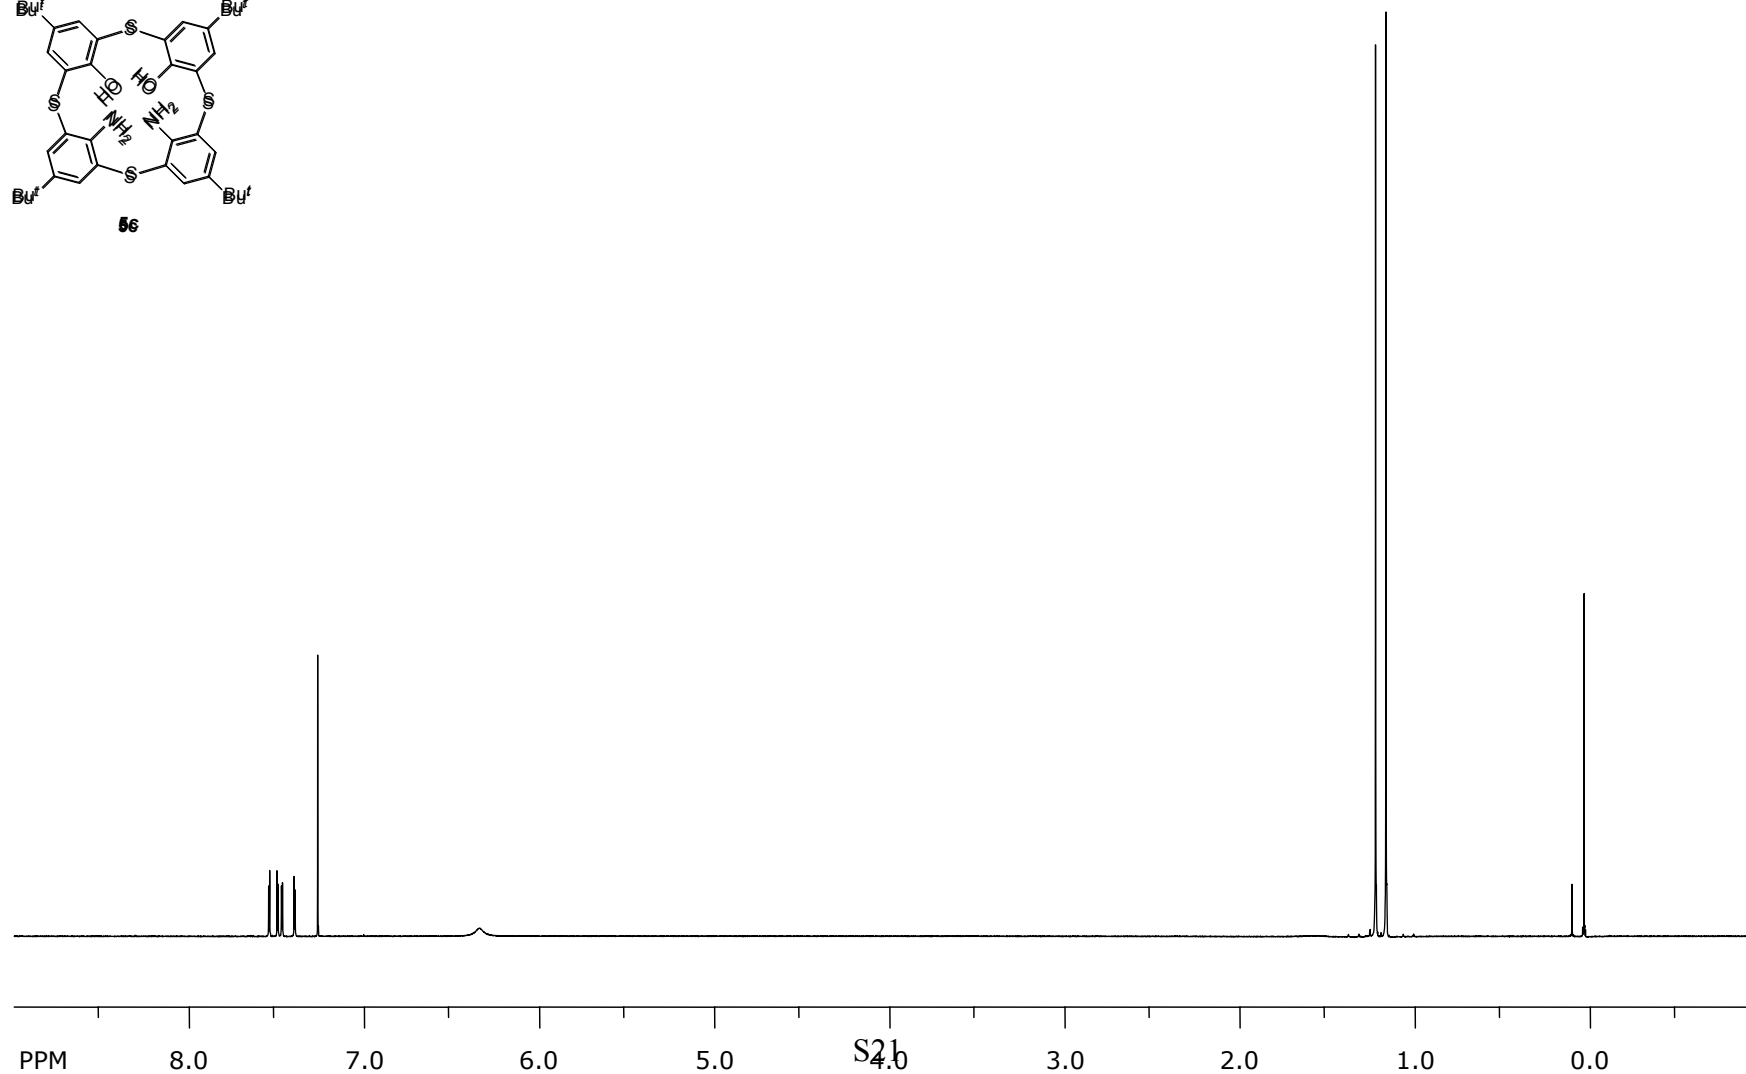

**25,26-Diamino-27,28-dihydroxy-tetra-*p*-*tert*-butylthiacalix[4]arene (5c)**

$\delta_C$  (100 MHz) 31.16, 31.24, 33.95, 34.09, 119.75, 120.12, 120.61, 120.99, 134.15, 134.23, 134.42, 134.77, 142.58, 143.69, 146.70 and 155.38

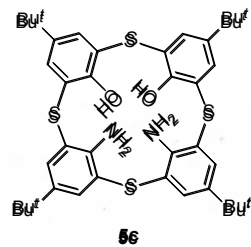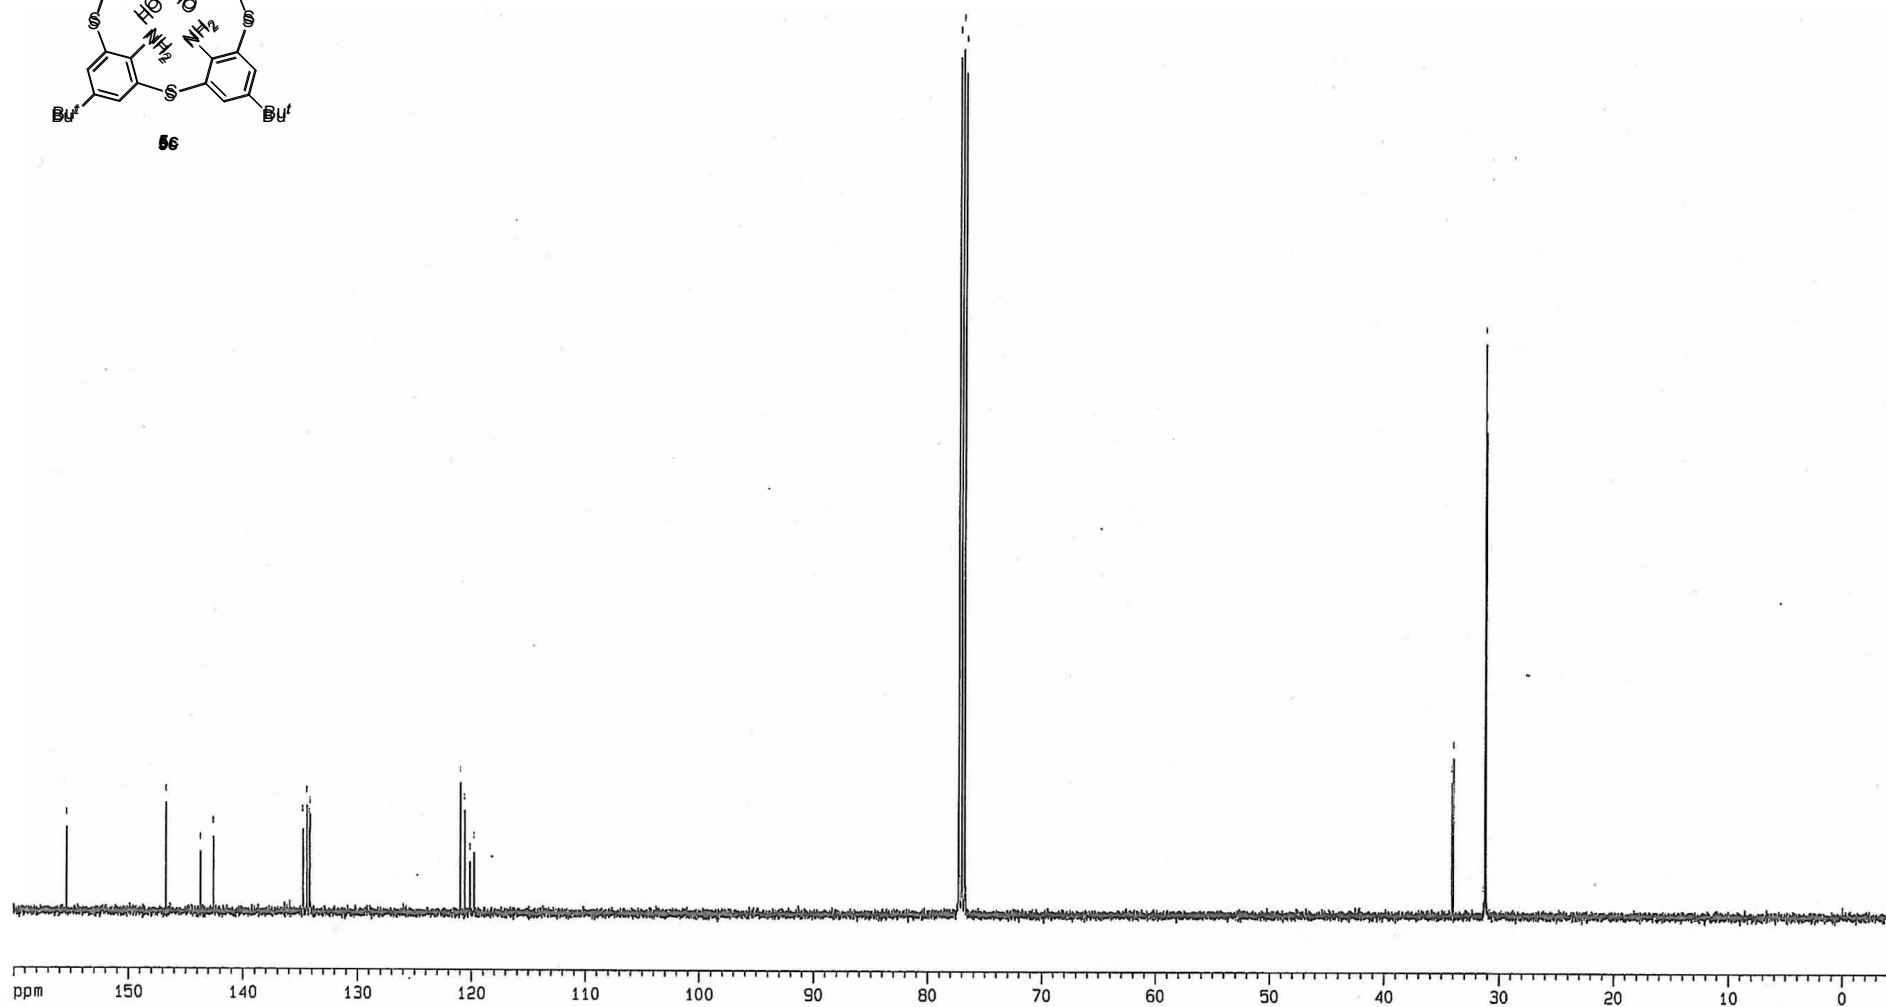

Supplement: c3ra47718e.pdf [file c3ra47718e.pdf]
